# Supplementary material for: Population Diversity and Genetic Structure Reveal Patterns of Host Association and Anthropogenic Impact for the Globally Important Fungal Tree Pathogen Ceratocystis manginecans
Source: MDPI journal article supplement (doi:10.3390/jof7090759), 2021-09-15
Supplement: s1 [file s1]

**Supplementary Materials:**

**Supplementary Figure S1.** Linkage disequilibrium testing ( $I_A$ , P-values  $> 0.01$ ).

**Supplementary Table S1.** List of *Ceratocystis* isolates included in the microsatellite study and the alleles scored at each locus using GeneScan™ fragment analyses and the GeneMapper™ software.

**Supplementary Table S2.** List of *Ceratocystis* isolates included in the microsatellite study and the alleles scored at each locus based on results obtained by sequencing.

**Supplementary Table S3.** GenBank numbers of alleles sequenced in this study.

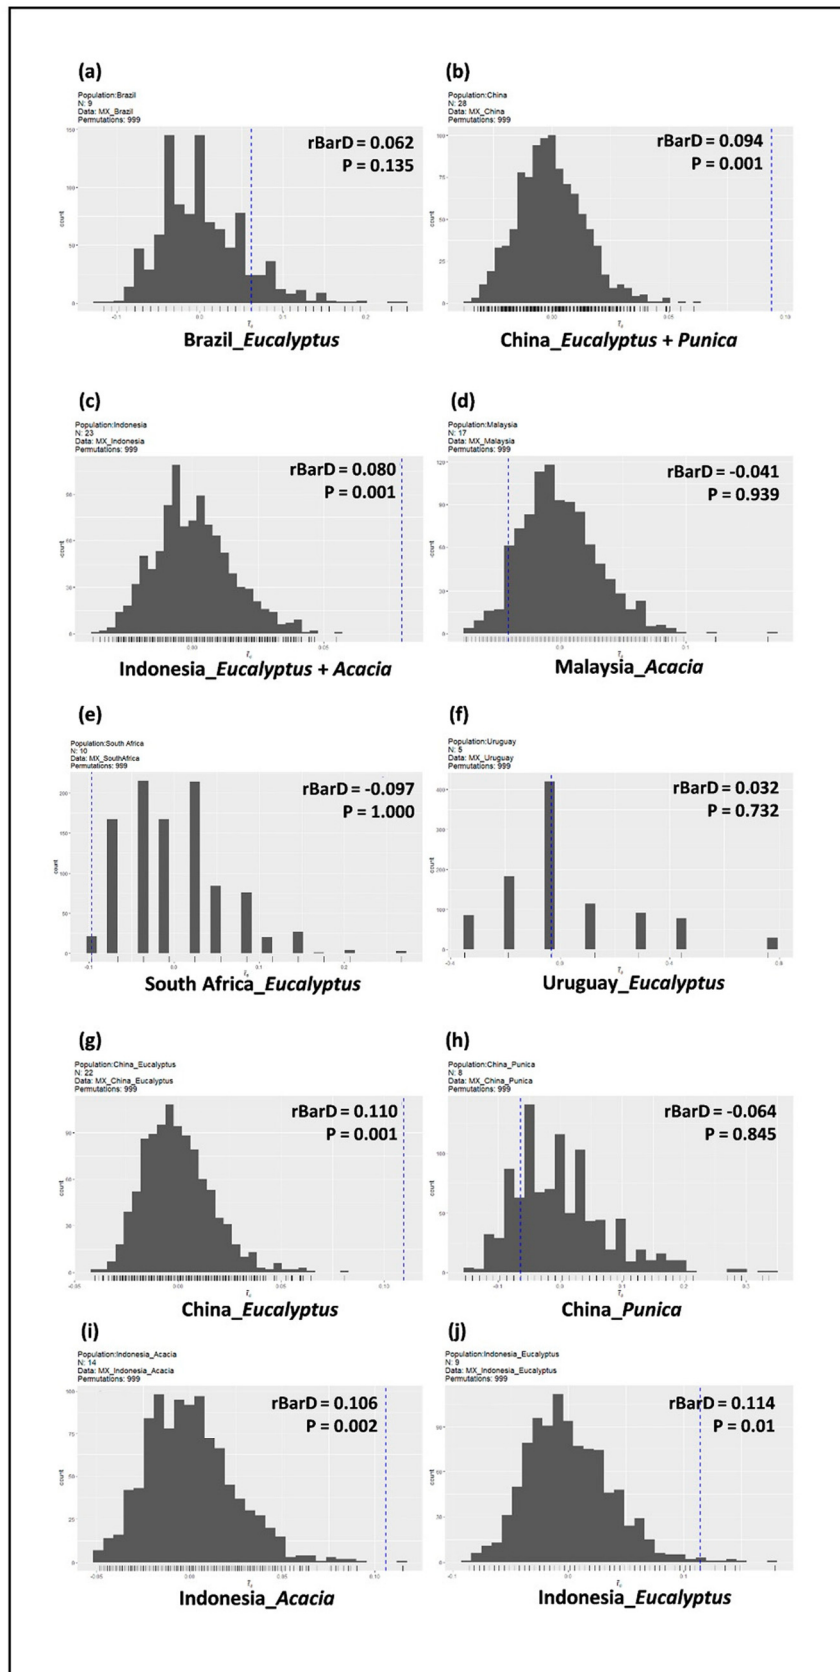

Supplementary Figure S1.

**Supplementary Table S1.** List of *Ceratocystis* isolates included in the microsatellite study and the alleles scored at each locus using GeneScan analyses.

|                       |                      |                       |           |                       | Panel AF           |                    |                    |                     |                    |                    |                    |                    |                    |                    |
|-----------------------|----------------------|-----------------------|-----------|-----------------------|--------------------|--------------------|--------------------|---------------------|--------------------|--------------------|--------------------|--------------------|--------------------|--------------------|
|                       |                      |                       |           |                       | AF2                | AF3                | AF4                | AF5                 | AF6                | AF7                | AF8                | AF9                | AF11               | AF12               |
| Primer                |                      |                       |           |                       |                    |                    |                    |                     |                    |                    |                    |                    |                    |                    |
| Dye                   |                      |                       |           |                       | VIC                | NED                | PET                | FAM                 | VIC                | NED                | PET                | FAM                | VIC                | PET                |
| Colour                |                      |                       |           |                       | Green              | Yellow             | Red                | Blue                | Green              | Yellow             | Red                | Blue               | Green              | Red                |
| Bin size in Genescan  |                      |                       |           |                       | 180–230            | 170–270            | 200–280            | 200–300             | 235–320            | 280–370            | 310–380            | 350–460            | 420–490            | 400–480            |
| Repeat type           |                      |                       |           |                       | (AGA) <sub>n</sub> | (CTG) <sub>n</sub> | (ACA) <sub>n</sub> | (GTCA) <sub>n</sub> | (GAG) <sub>n</sub> | (AGC) <sub>n</sub> | (GAG) <sub>n</sub> | (GCA) <sub>n</sub> | (ACA) <sub>n</sub> | (ACA) <sub>n</sub> |
| Dilution              |                      |                       |           |                       | 1/200              | 1/200              | 1.2/200            | 2.5/200             | 1/200              | 1.2/200            | 1/200              | 1/200              | 1/200              | 1/200              |
| Annealing temperature |                      |                       |           |                       | 55°C               | 55°C               | 55°C               | 54°C                | 54°C               | 55°C               | 54°C               | 54°C               | 55°C               | 57°C               |
| Taq                   |                      |                       |           |                       | My Taq             | My Taq             | My Taq             | My Taq              | My Taq             | My Taq             | My Taq             | My Taq             | My Taq             | My Taq             |
| Nr                    | Isolate <sup>a</sup> | Species               | Location  | Host                  |                    |                    |                    |                     |                    |                    |                    |                    |                    |                    |
| 1                     | CMW22563             | <i>C. manginecans</i> | Indonesia | <i>Acacia mangium</i> | 201                | 218                | 249                | 262                 | 300                | 325                | 349                | 412                | 455                | 453                |
| 2                     | CMW22561             | <i>C. manginecans</i> | Indonesia | <i>A. mangium</i>     | 201                | 218                | 249                | 262                 | 300                | 322                | 349                | 412                | 455                | 453                |
| 3                     | CMT66                | <i>C. manginecans</i> | Indonesia | <i>A. acaciofora</i>  | 206                | 218                | 249                | 262                 | 309                | 325                | 349                | 412                | 447                | 453                |
| 4                     | CMW22564             | <i>C. manginecans</i> | Indonesia | <i>A. mangium</i>     | 206                | 218                | 243                | 262                 | 300                | 325                | 349                | 412                | 447                | 453                |
| 5                     | CMT25                | <i>C. manginecans</i> | Indonesia | <i>A. acaciofora</i>  | 206                | 218                | 243                | 262                 | 300                | 325                | 349                | 412                | 447                | 459                |
| 6                     | CMT26                | <i>C. manginecans</i> | Indonesia | <i>A. acaciofora</i>  | 206                | 218                | 243                | 262                 | 300                | 325                | 349                | 412                | 447                | 459                |
| 7                     | CMT29                | <i>C. manginecans</i> | Indonesia | <i>A. acaciofora</i>  | 206                | 218                | 243                | 262                 | 300                | 325                | 349                | 412                | 447                | 459                |
| 8                     | CMT1                 | <i>C. manginecans</i> | Indonesia | <i>A. acaciofora</i>  | 206                | 218                | 243                | 262                 | 300                | 325                | 349                | 418                | 447                | 453                |
| 9                     | CMT10                | <i>C. manginecans</i> | Indonesia | <i>A. acaciofora</i>  | 206                | 218                | 243                | 262                 | 300                | 325                | 349                | 418                | 447                | 453                |
| 10                    | CMT100               | <i>C. manginecans</i> | Indonesia | <i>A. acaciofora</i>  | 206                | 218                | 243                | 262                 | 300                | 325                | 349                | 418                | 447                | 453                |
| 11                    | CMT101               | <i>C. manginecans</i> | Indonesia | <i>A. acaciofora</i>  | 206                | 218                | 243                | 262                 | 300                | 325                | 349                | 418                | 447                | 453                |
| 12                    | CMT102               | <i>C. manginecans</i> | Indonesia | <i>A. acaciofora</i>  | 206                | 218                | 243                | 262                 | 300                | 325                | 349                | 418                | 447                | 453                |
| 13                    | CMT103               | <i>C. manginecans</i> | Indonesia | <i>A. acaciofora</i>  | 206                | 218                | 243                | 262                 | 300                | 325                | 349                | 418                | 447                | 453                |
| 14                    | CMT11                | <i>C. manginecans</i> | Indonesia | <i>A. acaciofora</i>  | 206                | 218                | 243                | 262                 | 300                | 325                | 349                | 418                | 447                | 453                |
| 15                    | CMT12                | <i>C. manginecans</i> | Indonesia | <i>A. acaciofora</i>  | 206                | 218                | 243                | 262                 | 300                | 325                | 349                | 418                | 447                | 453                |
| 16                    | CMT13                | <i>C. manginecans</i> | Indonesia | <i>A. acaciofora</i>  | 206                | 218                | 243                | 262                 | 300                | 325                | 349                | 418                | 447                | 453                |
| 17                    | CMT15                | <i>C. manginecans</i> | Indonesia | <i>A. acaciofora</i>  | 206                | 218                | 243                | 262                 | 300                | 325                | 349                | 418                | 447                | 453                |
| 18                    | CMT16                | <i>C. manginecans</i> | Indonesia | <i>A. acaciofora</i>  | 206                | 218                | 243                | 262                 | 300                | 325                | 349                | 418                | 447                | 453                |
| 19                    | CMT17                | <i>C. manginecans</i> | Indonesia | <i>A. acaciofora</i>  | 206                | 218                | 243                | 262                 | 300                | 325                | 349                | 418                | 447                | 453                |

|    |          |                       |           |                        |     |     |     |     |     |     |     |     |     |     |
|----|----------|-----------------------|-----------|------------------------|-----|-----|-----|-----|-----|-----|-----|-----|-----|-----|
| 20 | CMT18    | <i>C. manginecans</i> | Indonesia | <i>A. acacinofoora</i> | 206 | 218 | 243 | 262 | 300 | 325 | 349 | 418 | 447 | 453 |
| 21 | CMT2     | <i>C. manginecans</i> | Indonesia | <i>A. acacinofoora</i> | 206 | 218 | 243 | 262 | 300 | 325 | 349 | 418 | 447 | 453 |
| 22 | CMT20    | <i>C. manginecans</i> | Indonesia | <i>A. acacinofoora</i> | 206 | 218 | 243 | 262 | 300 | 325 | 349 | 418 | 447 | 453 |
| 23 | CMT21    | <i>C. manginecans</i> | Indonesia | <i>A. acacinofoora</i> | 206 | 218 | 243 | 262 | 300 | 325 | 349 | 418 | 447 | 453 |
| 24 | CMT22    | <i>C. manginecans</i> | Indonesia | <i>A. acacinofoora</i> | 206 | 218 | 243 | 262 | 300 | 325 | 349 | 418 | 447 | 453 |
| 25 | CMT24    | <i>C. manginecans</i> | Indonesia | <i>A. acacinofoora</i> | 206 | 218 | 243 | 262 | 300 | 325 | 349 | 418 | 447 | 453 |
| 26 | CMT28    | <i>C. manginecans</i> | Indonesia | <i>A. acacinofoora</i> | 206 | 218 | 243 | 262 | 300 | 325 | 349 | 418 | 447 | 453 |
| 27 | CMT3     | <i>C. manginecans</i> | Indonesia | <i>A. acacinofoora</i> | 206 | 218 | 243 | 262 | 300 | 325 | 349 | 418 | 447 | 453 |
| 28 | CMT30    | <i>C. manginecans</i> | Indonesia | <i>A. acacinofoora</i> | 206 | 218 | 243 | 262 | 300 | 325 | 349 | 418 | 447 | 453 |
| 29 | CMT31    | <i>C. manginecans</i> | Indonesia | <i>A. acacinofoora</i> | 206 | 218 | 243 | 262 | 300 | 325 | 349 | 418 | 447 | 453 |
| 30 | CMT33    | <i>C. manginecans</i> | Indonesia | <i>A. acacinofoora</i> | 206 | 218 | 243 | 262 | 300 | 325 | 349 | 418 | 447 | 453 |
| 31 | CMT35    | <i>C. manginecans</i> | Indonesia | <i>A. acacinofoora</i> | 206 | 218 | 243 | 262 | 300 | 325 | 349 | 418 | 447 | 453 |
| 32 | CMT36    | <i>C. manginecans</i> | Indonesia | <i>A. acacinofoora</i> | 206 | 218 | 243 | 262 | 300 | 325 | 349 | 418 | 447 | 453 |
| 33 | CMT37    | <i>C. manginecans</i> | Indonesia | <i>A. acacinofoora</i> | 206 | 218 | 243 | 262 | 300 | 325 | 349 | 418 | 447 | 453 |
| 34 | CMT38    | <i>C. manginecans</i> | Indonesia | <i>A. acacinofoora</i> | 206 | 218 | 243 | 262 | 300 | 325 | 349 | 418 | 447 | 453 |
| 35 | CMT39    | <i>C. manginecans</i> | Indonesia | <i>A. acacinofoora</i> | 206 | 218 | 243 | 262 | 300 | 325 | 349 | 418 | 447 | 453 |
| 36 | CMT5     | <i>C. manginecans</i> | Indonesia | <i>A. acacinofoora</i> | 206 | 218 | 243 | 262 | 300 | 325 | 349 | 418 | 447 | 453 |
| 37 | CMT6     | <i>C. manginecans</i> | Indonesia | <i>A. acacinofoora</i> | 206 | 218 | 243 | 262 | 300 | 325 | 349 | 418 | 447 | 453 |
| 38 | CMT7     | <i>C. manginecans</i> | Indonesia | <i>A. acacinofoora</i> | 206 | 218 | 243 | 262 | 300 | 325 | 349 | 418 | 447 | 453 |
| 39 | CMT8     | <i>C. manginecans</i> | Indonesia | <i>A. acacinofoora</i> | 206 | 218 | 243 | 262 | 300 | 325 | 349 | 418 | 447 | 453 |
| 40 | CMT9     | <i>C. manginecans</i> | Indonesia | <i>A. acacinofoora</i> | 206 | 218 | 243 | 262 | 300 | 325 | 349 | 418 | 447 | 453 |
| 41 | CMT94    | <i>C. manginecans</i> | Indonesia | <i>A. acacinofoora</i> | 206 | 218 | 243 | 262 | 300 | 325 | 349 | 418 | 447 | 453 |
| 42 | CMT95    | <i>C. manginecans</i> | Indonesia | <i>A. acacinofoora</i> | 206 | 218 | 243 | 262 | 300 | 325 | 349 | 418 | 447 | 453 |
| 43 | CMT96    | <i>C. manginecans</i> | Indonesia | <i>A. acacinofoora</i> | 206 | 218 | 243 | 262 | 300 | 325 | 349 | 418 | 447 | 453 |
| 44 | CMT98    | <i>C. manginecans</i> | Indonesia | <i>A. acacinofoora</i> | 206 | 218 | 243 | 262 | 300 | 325 | 349 | 418 | 447 | 453 |
| 45 | CMT99    | <i>C. manginecans</i> | Indonesia | <i>A. acacinofoora</i> | 206 | 218 | 243 | 262 | 300 | 325 | 349 | 418 | 447 | 453 |
| 46 | CMT14    | <i>C. manginecans</i> | Indonesia | <i>A. acacinofoora</i> | 206 | 218 | 243 | 262 | 300 | 325 | 349 | 418 | 447 | 999 |
| 47 | CMT4     | <i>C. manginecans</i> | Indonesia | <i>A. acacinofoora</i> | 206 | 218 | 243 | 262 | 300 | 325 | 349 | 418 | 447 | 999 |
| 48 | CMW22587 | <i>C. manginecans</i> | Indonesia | <i>A. mangium</i>      | 206 | 218 | 243 | 262 | 294 | 325 | 349 | 418 | 447 | 453 |
| 49 | CMW22588 | <i>C. manginecans</i> | Indonesia | <i>A. mangium</i>      | 206 | 218 | 243 | 262 | 294 | 325 | 349 | 418 | 447 | 453 |
| 50 | CMW22589 | <i>C. manginecans</i> | Indonesia | <i>A. mangium</i>      | 206 | 218 | 243 | 262 | 294 | 325 | 349 | 418 | 447 | 453 |
| 51 | CMW22590 | <i>C. manginecans</i> | Indonesia | <i>A. mangium</i>      | 206 | 218 | 243 | 262 | 294 | 325 | 349 | 418 | 447 | 453 |
| 52 | CMW22591 | <i>C. manginecans</i> | Indonesia | <i>A. mangium</i>      | 206 | 218 | 243 | 262 | 294 | 325 | 349 | 418 | 447 | 453 |

|    |          |                       |           |                       |     |     |     |     |     |     |     |     |     |     |
|----|----------|-----------------------|-----------|-----------------------|-----|-----|-----|-----|-----|-----|-----|-----|-----|-----|
| 53 | CMW22593 | <i>C. manginecans</i> | Indonesia | <i>A. mangium</i>     | 206 | 218 | 243 | 262 | 294 | 325 | 349 | 418 | 447 | 453 |
| 54 | CMW22594 | <i>C. manginecans</i> | Indonesia | <i>A. mangium</i>     | 206 | 218 | 243 | 262 | 294 | 325 | 349 | 418 | 447 | 453 |
| 55 | CMW22595 | <i>C. manginecans</i> | Indonesia | <i>A. mangium</i>     | 206 | 218 | 243 | 262 | 294 | 325 | 349 | 418 | 447 | 453 |
| 56 | CMW22596 | <i>C. manginecans</i> | Indonesia | <i>A. mangium</i>     | 206 | 218 | 243 | 262 | 294 | 325 | 349 | 418 | 447 | 453 |
| 57 | CMW22597 | <i>C. manginecans</i> | Indonesia | <i>A. mangium</i>     | 206 | 218 | 243 | 262 | 294 | 325 | 349 | 418 | 447 | 453 |
| 58 | CMW22598 | <i>C. manginecans</i> | Indonesia | <i>A. mangium</i>     | 206 | 218 | 243 | 262 | 294 | 325 | 349 | 418 | 447 | 453 |
| 59 | CMW22618 | <i>C. manginecans</i> | Indonesia | <i>A. mangium</i>     | 206 | 218 | 243 | 262 | 294 | 325 | 349 | 418 | 447 | 456 |
| 60 | CMW22619 | <i>C. manginecans</i> | Indonesia | <i>A. mangium</i>     | 206 | 218 | 243 | 262 | 294 | 325 | 349 | 418 | 447 | 456 |
| 61 | CMW22621 | <i>C. manginecans</i> | Indonesia | <i>A. mangium</i>     | 206 | 218 | 243 | 262 | 294 | 325 | 349 | 418 | 447 | 456 |
| 62 | CMW22622 | <i>C. manginecans</i> | Indonesia | <i>A. mangium</i>     | 206 | 218 | 243 | 262 | 294 | 325 | 349 | 418 | 447 | 456 |
| 63 | CMW22623 | <i>C. manginecans</i> | Indonesia | <i>A. mangium</i>     | 206 | 218 | 243 | 262 | 294 | 325 | 349 | 418 | 447 | 456 |
| 64 | CMW22625 | <i>C. manginecans</i> | Indonesia | <i>A. mangium</i>     | 206 | 218 | 243 | 262 | 294 | 325 | 349 | 418 | 447 | 456 |
| 65 | CMW22626 | <i>C. manginecans</i> | Indonesia | <i>A. mangium</i>     | 206 | 218 | 243 | 262 | 294 | 325 | 349 | 418 | 447 | 456 |
| 66 | CMT64    | <i>C. manginecans</i> | Indonesia | <i>A. acacinofora</i> | 206 | 218 | 243 | 262 | 294 | 325 | 349 | 418 | 447 | 456 |
| 67 | CMT65    | <i>C. manginecans</i> | Indonesia | <i>A. acacinofora</i> | 206 | 218 | 243 | 262 | 294 | 325 | 349 | 418 | 447 | 456 |
| 68 | CMT67    | <i>C. manginecans</i> | Indonesia | <i>A. acacinofora</i> | 206 | 218 | 243 | 262 | 294 | 325 | 349 | 418 | 447 | 456 |
| 69 | CMT32    | <i>C. manginecans</i> | Indonesia | <i>A. acacinofora</i> | 206 | 218 | 243 | 262 | 294 | 325 | 346 | 418 | 447 | 453 |
| 70 | CMW22581 | <i>C. manginecans</i> | Indonesia | <i>A. mangium</i>     | 206 | 221 | 243 | 262 | 294 | 325 | 349 | 418 | 447 | 453 |
| 71 | CMW22560 | <i>C. manginecans</i> | Indonesia | <i>A. mangium</i>     | 206 | 221 | 243 | 262 | 294 | 325 | 346 | 418 | 447 | 456 |
| 72 | CMW22565 | <i>C. manginecans</i> | Indonesia | <i>A. mangium</i>     | 206 | 221 | 243 | 262 | 294 | 325 | 346 | 418 | 447 | 456 |
| 73 | CMW22566 | <i>C. manginecans</i> | Indonesia | <i>A. mangium</i>     | 206 | 221 | 243 | 262 | 294 | 325 | 346 | 418 | 447 | 456 |
| 74 | CMW22567 | <i>C. manginecans</i> | Indonesia | <i>A. mangium</i>     | 206 | 221 | 243 | 262 | 294 | 325 | 346 | 418 | 447 | 456 |
| 75 | CMW22568 | <i>C. manginecans</i> | Indonesia | <i>A. mangium</i>     | 206 | 221 | 243 | 262 | 294 | 325 | 346 | 418 | 447 | 456 |
| 76 | CMW22569 | <i>C. manginecans</i> | Indonesia | <i>A. mangium</i>     | 206 | 221 | 243 | 262 | 294 | 325 | 346 | 418 | 447 | 456 |
| 77 | CMW22570 | <i>C. manginecans</i> | Indonesia | <i>A. mangium</i>     | 206 | 221 | 243 | 262 | 294 | 325 | 346 | 418 | 447 | 456 |
| 78 | CMW22571 | <i>C. manginecans</i> | Indonesia | <i>A. mangium</i>     | 206 | 221 | 243 | 262 | 294 | 325 | 346 | 418 | 447 | 456 |
| 79 | CMW22572 | <i>C. manginecans</i> | Indonesia | <i>A. mangium</i>     | 206 | 221 | 243 | 262 | 294 | 325 | 346 | 418 | 447 | 456 |
| 80 | CMW22573 | <i>C. manginecans</i> | Indonesia | <i>A. mangium</i>     | 206 | 221 | 243 | 262 | 294 | 325 | 346 | 418 | 447 | 456 |
| 81 | CMW22574 | <i>C. manginecans</i> | Indonesia | <i>A. mangium</i>     | 206 | 221 | 243 | 262 | 294 | 325 | 346 | 418 | 447 | 456 |
| 82 | CMW22575 | <i>C. manginecans</i> | Indonesia | <i>A. mangium</i>     | 206 | 221 | 243 | 262 | 294 | 325 | 346 | 418 | 447 | 456 |
| 83 | CMW22576 | <i>C. manginecans</i> | Indonesia | <i>A. mangium</i>     | 206 | 221 | 243 | 262 | 294 | 325 | 346 | 418 | 447 | 456 |
| 84 | CMW22577 | <i>C. manginecans</i> | Indonesia | <i>A. mangium</i>     | 206 | 221 | 243 | 262 | 294 | 325 | 346 | 418 | 447 | 456 |
| 85 | CMW22578 | <i>C. manginecans</i> | Indonesia | <i>A. mangium</i>     | 206 | 221 | 243 | 262 | 294 | 325 | 346 | 418 | 447 | 456 |

|     |          |                         |           |                   |     |     |     |     |     |     |     |     |     |     |
|-----|----------|-------------------------|-----------|-------------------|-----|-----|-----|-----|-----|-----|-----|-----|-----|-----|
| 86  | CMW22579 | <i>C. manginecans</i>   | Indonesia | <i>A. mangium</i> | 206 | 221 | 243 | 262 | 294 | 325 | 346 | 418 | 447 | 456 |
| 87  | CMW22580 | <i>C. manginecans</i>   | Indonesia | <i>A. mangium</i> | 206 | 221 | 243 | 262 | 294 | 325 | 346 | 418 | 447 | 456 |
| 88  | CMW22582 | <i>C. manginecans</i>   | Indonesia | <i>A. mangium</i> | 206 | 221 | 243 | 262 | 294 | 322 | 349 | 418 | 447 | 453 |
| 89  | CMW22583 | <i>C. manginecans</i>   | Indonesia | <i>A. mangium</i> | 206 | 221 | 243 | 262 | 294 | 322 | 349 | 418 | 447 | 453 |
| 90  | CMW22584 | <i>C. manginecans</i>   | Indonesia | <i>A. mangium</i> | 206 | 221 | 243 | 262 | 294 | 322 | 349 | 418 | 447 | 453 |
| 91  | CMW22585 | <i>C. manginecans</i>   | Indonesia | <i>A. mangium</i> | 206 | 221 | 243 | 262 | 294 | 322 | 349 | 418 | 447 | 453 |
| 92  | CMW22600 | <i>C. manginecans</i>   | Indonesia | <i>A. mangium</i> | 206 | 221 | 243 | 262 | 294 | 322 | 349 | 418 | 447 | 453 |
| 93  | CMW22601 | <i>C. manginecans</i>   | Indonesia | <i>A. mangium</i> | 206 | 221 | 243 | 262 | 294 | 322 | 349 | 418 | 447 | 453 |
| 94  | CMW22603 | <i>C. manginecans</i>   | Indonesia | <i>A. mangium</i> | 206 | 221 | 243 | 262 | 294 | 322 | 349 | 418 | 447 | 453 |
| 95  | CMW22606 | <i>C. manginecans</i>   | Indonesia | <i>A. mangium</i> | 206 | 221 | 243 | 262 | 294 | 322 | 349 | 418 | 447 | 453 |
| 96  | CMW22607 | <i>C. manginecans</i>   | Indonesia | <i>A. mangium</i> | 206 | 221 | 243 | 262 | 294 | 322 | 349 | 418 | 447 | 453 |
| 97  | CMW22608 | <i>C. manginecans</i>   | Indonesia | <i>A. mangium</i> | 206 | 221 | 243 | 262 | 294 | 322 | 349 | 418 | 447 | 453 |
| 98  | CMW22609 | <i>C. manginecans</i>   | Indonesia | <i>A. mangium</i> | 206 | 221 | 243 | 262 | 294 | 322 | 349 | 418 | 447 | 453 |
| 99  | CMW22612 | <i>C. manginecans</i>   | Indonesia | <i>A. mangium</i> | 206 | 221 | 243 | 262 | 294 | 322 | 349 | 418 | 447 | 453 |
| 100 | CMW22613 | <i>C. manginecans</i>   | Indonesia | <i>A. mangium</i> | 206 | 221 | 243 | 262 | 294 | 322 | 349 | 418 | 447 | 453 |
| 101 | CMW22614 | <i>C. manginecans</i>   | Indonesia | <i>A. mangium</i> | 206 | 221 | 243 | 262 | 294 | 322 | 349 | 418 | 447 | 453 |
| 102 | CMW22615 | <i>C. manginecans</i>   | Indonesia | <i>A. mangium</i> | 206 | 221 | 243 | 262 | 294 | 322 | 349 | 418 | 447 | 453 |
| 103 | CMW22616 | <i>C. manginecans</i>   | Indonesia | <i>A. mangium</i> | 206 | 221 | 243 | 262 | 294 | 322 | 349 | 418 | 447 | 453 |
| 104 | CMW22617 | <i>C. manginecans</i>   | Indonesia | <i>A. mangium</i> | 206 | 221 | 243 | 262 | 294 | 322 | 349 | 418 | 447 | 453 |
| 105 | CMW22599 | <i>C. manginecans</i>   | Indonesia | <i>A. mangium</i> | 206 | 221 | 243 | 250 | 294 | 322 | 346 | 418 | 447 | 456 |
| 106 | CMW22602 | <i>C. manginecans</i>   | Indonesia | <i>A. mangium</i> | 206 | 221 | 243 | 250 | 294 | 322 | 346 | 418 | 447 | 456 |
| 107 | CMW22604 | <i>C. manginecans</i>   | Indonesia | <i>A. mangium</i> | 206 | 221 | 243 | 250 | 294 | 322 | 346 | 418 | 447 | 456 |
| 108 | CMW22605 | <i>C. manginecans</i>   | Indonesia | <i>A. mangium</i> | 206 | 221 | 243 | 250 | 294 | 322 | 346 | 418 | 447 | 456 |
| 109 | CMW22610 | <i>C. manginecans</i>   | Indonesia | <i>A. mangium</i> | 206 | 221 | 243 | 250 | 294 | 322 | 346 | 418 | 447 | 456 |
| 110 | CMW22611 | <i>C. manginecans</i>   | Indonesia | <i>A. mangium</i> | 206 | 221 | 243 | 250 | 294 | 322 | 346 | 418 | 447 | 456 |
| 111 | CMW41202 | <i>C. manginecans</i>   | Malaysia  | <i>A. mangium</i> | 201 | 221 | 243 | 250 | 294 | 325 | 349 | 418 | 447 | 456 |
| 112 | CMW41190 | <i>C. manginecans</i>   | Malaysia  | <i>A. mangium</i> | 201 | 221 | 243 | 250 | 294 | 322 | 346 | 418 | 447 | 453 |
| 113 | CMW42003 | <i>C. manginecans</i>   | Malaysia  | <i>A. mangium</i> | 206 | 218 | 243 | 250 | 294 | 322 | 346 | 418 | 447 | 453 |
| 114 | CMW41203 | <i>C. eucalypticola</i> | Malaysia  | <i>A. mangium</i> | 206 | 221 | 243 | 250 | 300 | 325 | 349 | 418 | 447 | 453 |
| 115 | CMW39172 | <i>C. manginecans</i>   | Malaysia  | <i>A. mangium</i> | 206 | 221 | 243 | 250 | 294 | 325 | 346 | 412 | 447 | 453 |
| 116 | CMW41147 | <i>C. manginecans</i>   | Malaysia  | <i>A. mangium</i> | 206 | 221 | 243 | 250 | 294 | 325 | 346 | 412 | 447 | 441 |
| 117 | CMW41168 | <i>C. manginecans</i>   | Malaysia  | <i>A. mangium</i> | 206 | 221 | 243 | 250 | 294 | 325 | 346 | 412 | 447 | 441 |
| 118 | CMW38751 | <i>C. manginecans</i>   | Malaysia  | <i>A. mangium</i> | 206 | 221 | 243 | 250 | 294 | 325 | 346 | 418 | 447 | 453 |

|     |          |                       |          |                   |     |     |     |     |     |     |     |     |     |     |
|-----|----------|-----------------------|----------|-------------------|-----|-----|-----|-----|-----|-----|-----|-----|-----|-----|
| 119 | CMW38754 | <i>C. manginecans</i> | Malaysia | <i>A. mangium</i> | 206 | 221 | 243 | 250 | 294 | 325 | 346 | 418 | 447 | 453 |
| 120 | CMW41155 | <i>C. manginecans</i> | Malaysia | <i>A. mangium</i> | 206 | 221 | 243 | 250 | 294 | 325 | 346 | 418 | 447 | 453 |
| 121 | CMW41171 | <i>C. manginecans</i> | Malaysia | <i>A. mangium</i> | 206 | 221 | 243 | 250 | 294 | 325 | 346 | 418 | 447 | 453 |
| 122 | CMW41193 | <i>C. manginecans</i> | Malaysia | <i>A. mangium</i> | 206 | 221 | 243 | 250 | 294 | 325 | 346 | 418 | 447 | 453 |
| 123 | CMW41152 | <i>C. manginecans</i> | Malaysia | <i>A. mangium</i> | 206 | 221 | 243 | 250 | 294 | 325 | 346 | 418 | 447 | 441 |
| 124 | CMW41160 | <i>C. manginecans</i> | Malaysia | <i>A. mangium</i> | 206 | 221 | 243 | 250 | 294 | 325 | 346 | 418 | 447 | 441 |
| 125 | CMW41181 | <i>C. manginecans</i> | Malaysia | <i>A. mangium</i> | 206 | 221 | 243 | 250 | 294 | 325 | 346 | 418 | 447 | 441 |
| 126 | CMW42006 | <i>C. manginecans</i> | Malaysia | <i>A. mangium</i> | 206 | 221 | 243 | 250 | 294 | 325 | 346 | 418 | 447 | 456 |
| 127 | CMW38750 | <i>C. manginecans</i> | Malaysia | <i>A. mangium</i> | 206 | 221 | 243 | 250 | 294 | 322 | 346 | 418 | 447 | 453 |
| 128 | CMW38753 | <i>C. manginecans</i> | Malaysia | <i>A. mangium</i> | 206 | 221 | 243 | 250 | 294 | 322 | 346 | 418 | 447 | 453 |
| 129 | CMW39136 | <i>C. manginecans</i> | Malaysia | <i>A. mangium</i> | 206 | 221 | 243 | 250 | 294 | 322 | 346 | 418 | 447 | 453 |
| 130 | CMW39141 | <i>C. manginecans</i> | Malaysia | <i>A. mangium</i> | 206 | 221 | 243 | 250 | 294 | 322 | 346 | 418 | 447 | 453 |
| 131 | CMW39152 | <i>C. manginecans</i> | Malaysia | <i>A. mangium</i> | 206 | 221 | 243 | 250 | 294 | 322 | 346 | 418 | 447 | 453 |
| 132 | CMW39155 | <i>C. manginecans</i> | Malaysia | <i>A. mangium</i> | 206 | 221 | 243 | 250 | 294 | 322 | 346 | 418 | 447 | 453 |
| 133 | CMW39157 | <i>C. manginecans</i> | Malaysia | <i>A. mangium</i> | 206 | 221 | 243 | 250 | 294 | 322 | 346 | 418 | 447 | 453 |
| 134 | CMW39162 | <i>C. manginecans</i> | Malaysia | <i>A. mangium</i> | 206 | 221 | 243 | 250 | 294 | 322 | 346 | 418 | 447 | 453 |
| 135 | CMW39168 | <i>C. manginecans</i> | Malaysia | <i>A. mangium</i> | 206 | 221 | 243 | 250 | 294 | 322 | 346 | 418 | 447 | 453 |
| 136 | CMW39171 | <i>C. manginecans</i> | Malaysia | <i>A. mangium</i> | 206 | 221 | 243 | 250 | 294 | 322 | 346 | 418 | 447 | 453 |
| 137 | CMW39180 | <i>C. manginecans</i> | Malaysia | <i>A. mangium</i> | 206 | 221 | 243 | 250 | 294 | 322 | 346 | 418 | 447 | 453 |
| 138 | CMW39182 | <i>C. manginecans</i> | Malaysia | <i>A. mangium</i> | 206 | 221 | 243 | 250 | 294 | 322 | 346 | 418 | 447 | 453 |
| 139 | CMW41138 | <i>C. manginecans</i> | Malaysia | <i>A. mangium</i> | 206 | 221 | 243 | 250 | 294 | 322 | 346 | 418 | 447 | 453 |
| 140 | CMW41149 | <i>C. manginecans</i> | Malaysia | <i>A. mangium</i> | 206 | 221 | 243 | 250 | 294 | 322 | 346 | 418 | 447 | 453 |
| 141 | CMW41157 | <i>C. manginecans</i> | Malaysia | <i>A. mangium</i> | 206 | 221 | 243 | 250 | 294 | 322 | 346 | 418 | 447 | 453 |
| 142 | CMW41170 | <i>C. manginecans</i> | Malaysia | <i>A. mangium</i> | 206 | 221 | 243 | 250 | 294 | 322 | 346 | 418 | 447 | 453 |
| 143 | CMW41173 | <i>C. manginecans</i> | Malaysia | <i>A. mangium</i> | 206 | 221 | 243 | 250 | 294 | 322 | 346 | 418 | 447 | 453 |
| 144 | CMW41174 | <i>C. manginecans</i> | Malaysia | <i>A. mangium</i> | 206 | 221 | 243 | 250 | 294 | 322 | 346 | 418 | 447 | 453 |
| 145 | CMW41182 | <i>C. manginecans</i> | Malaysia | <i>A. mangium</i> | 206 | 221 | 243 | 250 | 294 | 322 | 346 | 418 | 447 | 453 |
| 146 | CMW41194 | <i>C. manginecans</i> | Malaysia | <i>A. mangium</i> | 206 | 221 | 243 | 250 | 294 | 322 | 346 | 418 | 447 | 453 |
| 147 | CMW39144 | <i>C. manginecans</i> | Malaysia | <i>A. mangium</i> | 206 | 221 | 243 | 250 | 294 | 322 | 346 | 418 | 447 | 441 |
| 148 | CMW39149 | <i>C. manginecans</i> | Malaysia | <i>A. mangium</i> | 206 | 221 | 243 | 250 | 294 | 322 | 346 | 418 | 447 | 441 |
| 149 | CMW39161 | <i>C. manginecans</i> | Malaysia | <i>A. mangium</i> | 206 | 221 | 243 | 250 | 294 | 322 | 346 | 418 | 447 | 441 |
| 150 | CMW39173 | <i>C. manginecans</i> | Malaysia | <i>A. mangium</i> | 206 | 221 | 243 | 250 | 294 | 322 | 346 | 418 | 447 | 441 |
| 151 | CMW39174 | <i>C. manginecans</i> | Malaysia | <i>A. mangium</i> | 206 | 221 | 243 | 250 | 294 | 322 | 346 | 418 | 447 | 441 |

|     |          |                         |           |                       |     |     |     |     |     |     |     |     |     |     |
|-----|----------|-------------------------|-----------|-----------------------|-----|-----|-----|-----|-----|-----|-----|-----|-----|-----|
| 152 | CMW39176 | <i>C. manginecans</i>   | Malaysia  | <i>A. mangium</i>     | 206 | 221 | 243 | 250 | 294 | 322 | 346 | 418 | 447 | 441 |
| 153 | CMW41140 | <i>C. manginecans</i>   | Malaysia  | <i>A. mangium</i>     | 206 | 221 | 243 | 250 | 294 | 322 | 346 | 418 | 447 | 441 |
| 154 | CMW41143 | <i>C. manginecans</i>   | Malaysia  | <i>A. mangium</i>     | 206 | 221 | 243 | 250 | 294 | 322 | 346 | 418 | 447 | 441 |
| 155 | CMW41150 | <i>C. manginecans</i>   | Malaysia  | <i>A. mangium</i>     | 206 | 221 | 243 | 250 | 294 | 322 | 346 | 418 | 447 | 441 |
| 156 | CMW41164 | <i>C. manginecans</i>   | Malaysia  | <i>A. mangium</i>     | 206 | 221 | 243 | 250 | 294 | 322 | 346 | 418 | 447 | 441 |
| 157 | CMW41169 | <i>C. manginecans</i>   | Malaysia  | <i>A. mangium</i>     | 206 | 221 | 243 | 250 | 294 | 322 | 346 | 418 | 447 | 441 |
| 158 | CMW39139 | <i>C. manginecans</i>   | Malaysia  | <i>A. mangium</i>     | 206 | 221 | 243 | 250 | 294 | 322 | 346 | 418 | 447 | 456 |
| 159 | CMW41139 | <i>C. manginecans</i>   | Malaysia  | <i>A. mangium</i>     | 206 | 221 | 243 | 250 | 294 | 322 | 346 | 418 | 447 | 459 |
| 160 | CMW41148 | <i>C. manginecans</i>   | Malaysia  | <i>A. mangium</i>     | 206 | 221 | 243 | 250 | 294 | 322 | 346 | 418 | 444 | 441 |
| 161 | CMW41146 | <i>C. manginecans</i>   | Malaysia  | <i>A. mangium</i>     | 206 | 221 | 243 | 250 | 294 | 319 | 346 | 418 | 447 | 453 |
| 162 | CMW36164 | <i>C. manginecans</i>   | Malaysia  | <i>A. mangium</i>     | 206 | 221 | 243 | 250 | 291 | 325 | 346 | 418 | 447 | 453 |
| 163 | CMW39153 | <i>C. manginecans</i>   | Malaysia  | <i>A. mangium</i>     | 206 | 221 | 243 | 250 | 291 | 325 | 346 | 418 | 447 | 453 |
| 164 | CMW41142 | <i>C. manginecans</i>   | Malaysia  | <i>A. mangium</i>     | 209 | 221 | 243 | 250 | 294 | 322 | 346 | 418 | 447 | 453 |
| 165 | CMW41159 | <i>C. manginecans</i>   | Malaysia  | <i>A. mangium</i>     | 209 | 221 | 243 | 250 | 294 | 322 | 346 | 418 | 447 | 453 |
| 166 | CMW49238 | <i>C. eucalypticola</i> | Brazil    | <i>Eucalyptus</i> sp. | 201 | 218 | 249 | 250 | 300 | 325 | 349 | 412 | 455 | 423 |
| 167 | CMW49250 | <i>C. eucalypticola</i> | Brazil    | <i>Eucalyptus</i> sp. | 201 | 218 | 249 | 250 | 300 | 325 | 349 | 415 | 455 | 444 |
| 168 | CMW49237 | <i>C. eucalypticola</i> | Brazil    | <i>Eucalyptus</i> sp. | 201 | 218 | 249 | 250 | 300 | 325 | 352 | 415 | 450 | 423 |
| 169 | CMW49233 | <i>C. eucalypticola</i> | Brazil    | <i>Eucalyptus</i> sp. | 201 | 218 | 249 | 250 | 300 | 325 | 352 | 415 | 450 | 423 |
| 170 | CMW49252 | <i>C. eucalypticola</i> | Brazil    | <i>Eucalyptus</i> sp. | 198 | 218 | 249 | 250 | 300 | 325 | 349 | 412 | 452 | 429 |
| 171 | CMW49253 | <i>C. eucalypticola</i> | Brazil    | <i>Eucalyptus</i> sp. | 198 | 218 | 249 | 250 | 300 | 325 | 349 | 412 | 452 | 429 |
| 172 | CMW49239 | <i>C. eucalypticola</i> | Brazil    | <i>Eucalyptus</i> sp. | 198 | 218 | 249 | 250 | 300 | 325 | 349 | 412 | 452 | 432 |
| 173 | CMW49236 | <i>C. eucalypticola</i> | Brazil    | <i>Eucalyptus</i> sp. | 198 | 218 | 249 | 250 | 300 | 325 | 349 | 415 | 452 | 423 |
| 174 | CMW49254 | <i>C. eucalypticola</i> | Brazil    | <i>Eucalyptus</i> sp. | 198 | 218 | 249 | 250 | 300 | 325 | 349 | 415 | 452 | 444 |
| 175 | CMW49255 | <i>C. eucalypticola</i> | Brazil    | <i>Eucalyptus</i> sp. | 198 | 218 | 249 | 250 | 300 | 325 | 349 | 415 | 452 | 444 |
| 176 | CMW4903  | <i>C. eucalypticola</i> | Brazil    | <i>Eucalyptus</i> sp. | 198 | 218 | 249 | 250 | 300 | 325 | 349 | 415 | 452 | 447 |
| 177 | CMW49251 | <i>C. eucalypticola</i> | Brazil    | <i>Eucalyptus</i> sp. | 198 | 218 | 249 | 250 | 300 | 325 | 349 | 415 | 452 | 447 |
| 178 | CMW49235 | <i>C. eucalypticola</i> | Brazil    | <i>Eucalyptus</i> sp. | 198 | 218 | 249 | 250 | 294 | 325 | 349 | 412 | 452 | 429 |
| 179 | CERC2453 | <i>C. eucalypticola</i> | China, FJ | <i>Eucalyptus</i> sp. | 201 | 218 | 249 | 262 | 300 | 325 | 349 | 412 | 455 | 447 |
| 180 | CERC2454 | <i>C. eucalypticola</i> | China, FJ | <i>Eucalyptus</i> sp. | 201 | 218 | 249 | 262 | 300 | 325 | 349 | 412 | 455 | 447 |
| 181 | CERC2455 | <i>C. eucalypticola</i> | China, FJ | <i>Eucalyptus</i> sp. | 201 | 218 | 249 | 262 | 300 | 325 | 349 | 412 | 455 | 447 |
| 182 | CERC2476 | <i>C. eucalypticola</i> | China, FJ | <i>Eucalyptus</i> sp. | 201 | 218 | 249 | 262 | 300 | 325 | 349 | 412 | 455 | 447 |
| 183 | CERC2477 | <i>C. eucalypticola</i> | China, FJ | <i>Eucalyptus</i> sp. | 201 | 218 | 249 | 262 | 300 | 325 | 349 | 412 | 455 | 447 |
| 184 | CERC2478 | <i>C. eucalypticola</i> | China, FJ | <i>Eucalyptus</i> sp. | 201 | 218 | 249 | 262 | 300 | 325 | 349 | 412 | 455 | 447 |



|     |          |                         |           |                       |     |     |     |     |     |     |     |     |     |     |
|-----|----------|-------------------------|-----------|-----------------------|-----|-----|-----|-----|-----|-----|-----|-----|-----|-----|
| 185 | CERC2479 | <i>C. eucalypticola</i> | China, FJ | <i>Eucalyptus</i> sp. | 201 | 218 | 249 | 262 | 300 | 325 | 349 | 412 | 455 | 447 |
| 186 | CERC2480 | <i>C. eucalypticola</i> | China, FJ | <i>Eucalyptus</i> sp. | 198 | 218 | 249 | 262 | 300 | 325 | 349 | 412 | 455 | 447 |
| 187 | CERC2487 | <i>C. eucalypticola</i> | China, FJ | <i>Eucalyptus</i> sp. | 198 | 218 | 249 | 250 | 300 | 325 | 349 | 412 | 455 | 450 |
| 188 | CERC2488 | <i>C. eucalypticola</i> | China, FJ | <i>Eucalyptus</i> sp. | 198 | 218 | 249 | 250 | 300 | 325 | 349 | 412 | 455 | 450 |
| 189 | CERC2489 | <i>C. eucalypticola</i> | China, FJ | <i>Eucalyptus</i> sp. | 198 | 218 | 249 | 250 | 300 | 325 | 349 | 412 | 455 | 450 |
| 190 | CERC2490 | <i>C. eucalypticola</i> | China, FJ | <i>Eucalyptus</i> sp. | 198 | 218 | 249 | 250 | 300 | 325 | 349 | 412 | 455 | 450 |
| 191 | CERC2491 | <i>C. eucalypticola</i> | China, FJ | <i>Eucalyptus</i> sp. | 198 | 218 | 249 | 250 | 300 | 325 | 349 | 412 | 455 | 450 |
| 192 | CERC2545 | <i>C. eucalypticola</i> | China, GD | <i>Eucalyptus</i> sp. | 201 | 218 | 249 | 262 | 300 | 325 | 343 | 412 | 455 | 420 |
| 193 | CERC2546 | <i>C. eucalypticola</i> | China, GD | <i>Eucalyptus</i> sp. | 201 | 218 | 249 | 262 | 300 | 325 | 343 | 412 | 455 | 420 |
| 194 | CERC2612 | <i>C. eucalypticola</i> | China, GD | <i>Eucalyptus</i> sp. | 201 | 218 | 249 | 262 | 300 | 325 | 343 | 412 | 450 | 447 |
| 195 | CMW24667 | <i>C. eucalypticola</i> | China, GD | <i>Eucalyptus</i> sp. | 201 | 218 | 249 | 250 | 300 | 325 | 349 | 412 | 455 | 447 |
| 196 | CERC2555 | <i>C. eucalypticola</i> | China, GD | <i>Eucalyptus</i> sp. | 201 | 218 | 249 | 250 | 300 | 325 | 349 | 412 | 450 | 447 |
| 197 | CERC2556 | <i>C. eucalypticola</i> | China, GD | <i>Eucalyptus</i> sp. | 201 | 218 | 249 | 250 | 300 | 325 | 349 | 412 | 450 | 447 |
| 198 | CERC2557 | <i>C. eucalypticola</i> | China, GD | <i>Eucalyptus</i> sp. | 201 | 218 | 249 | 250 | 300 | 325 | 349 | 412 | 450 | 447 |
| 199 | CMW24664 | <i>C. eucalypticola</i> | China, GD | <i>Eucalyptus</i> sp. | 201 | 218 | 252 | 262 | 300 | 325 | 349 | 412 | 455 | 420 |
| 200 | CMW24673 | <i>C. eucalypticola</i> | China, GD | <i>Eucalyptus</i> sp. | 201 | 218 | 252 | 262 | 300 | 325 | 349 | 412 | 455 | 420 |
| 201 | CERC2620 | <i>C. eucalypticola</i> | China, GD | <i>Eucalyptus</i> sp. | 201 | 218 | 252 | 250 | 300 | 325 | 349 | 412 | 450 | 447 |
| 202 | CERC2621 | <i>C. eucalypticola</i> | China, GD | <i>Eucalyptus</i> sp. | 201 | 218 | 252 | 250 | 300 | 325 | 349 | 412 | 450 | 447 |
| 203 | CERC2629 | <i>C. manginecans</i>   | China, GD | <i>Eucalyptus</i> sp. | 201 | 221 | 252 | 250 | 294 | 325 | 346 | 418 | 450 | 453 |
| 204 | CERC2630 | <i>C. manginecans</i>   | China, GD | <i>Eucalyptus</i> sp. | 201 | 221 | 252 | 250 | 294 | 325 | 346 | 418 | 450 | 453 |
| 205 | CERC2631 | <i>C. manginecans</i>   | China, GD | <i>Eucalyptus</i> sp. | 201 | 221 | 252 | 250 | 294 | 325 | 346 | 418 | 450 | 453 |
| 206 | CERC2632 | <i>C. manginecans</i>   | China, GD | <i>Eucalyptus</i> sp. | 201 | 221 | 252 | 250 | 294 | 325 | 346 | 418 | 450 | 453 |
| 207 | CERC2633 | <i>C. manginecans</i>   | China, GD | <i>Eucalyptus</i> sp. | 201 | 221 | 252 | 250 | 294 | 325 | 346 | 418 | 450 | 453 |
| 208 | CERC2634 | <i>C. manginecans</i>   | China, GD | <i>Eucalyptus</i> sp. | 201 | 221 | 252 | 250 | 294 | 325 | 346 | 418 | 450 | 453 |
| 209 | CERC2635 | <i>C. manginecans</i>   | China, GD | <i>Eucalyptus</i> sp. | 201 | 221 | 252 | 250 | 294 | 325 | 346 | 418 | 450 | 453 |
| 210 | CERC2636 | <i>C. manginecans</i>   | China, GD | <i>Eucalyptus</i> sp. | 201 | 221 | 252 | 250 | 294 | 325 | 346 | 418 | 450 | 453 |
| 211 | CERC2637 | <i>C. manginecans</i>   | China, GD | <i>Eucalyptus</i> sp. | 201 | 221 | 252 | 250 | 294 | 325 | 346 | 418 | 450 | 453 |
| 212 | CERC2638 | <i>C. manginecans</i>   | China, GD | <i>Eucalyptus</i> sp. | 201 | 221 | 252 | 250 | 294 | 325 | 346 | 418 | 450 | 453 |
| 213 | CERC2639 | <i>C. manginecans</i>   | China, GD | <i>Eucalyptus</i> sp. | 201 | 221 | 252 | 250 | 294 | 325 | 346 | 418 | 450 | 453 |
| 214 | CERC2640 | <i>C. manginecans</i>   | China, GD | <i>Eucalyptus</i> sp. | 201 | 221 | 252 | 250 | 294 | 325 | 346 | 418 | 450 | 453 |
| 215 | CERC2641 | <i>C. manginecans</i>   | China, GD | <i>Eucalyptus</i> sp. | 201 | 221 | 252 | 250 | 294 | 325 | 346 | 418 | 450 | 453 |
| 216 | CERC2642 | <i>C. manginecans</i>   | China, GD | <i>Eucalyptus</i> sp. | 201 | 221 | 252 | 250 | 294 | 325 | 346 | 418 | 450 | 453 |
| 217 | CERC2643 | <i>C. manginecans</i>   | China, GD | <i>Eucalyptus</i> sp. | 201 | 221 | 252 | 250 | 294 | 325 | 346 | 418 | 450 | 453 |

|     |          |                         |           |                       |     |     |     |     |     |     |     |     |     |     |
|-----|----------|-------------------------|-----------|-----------------------|-----|-----|-----|-----|-----|-----|-----|-----|-----|-----|
| 218 | CERC2644 | <i>C. manginecans</i>   | China, GD | <i>Eucalyptus</i> sp. | 201 | 221 | 252 | 250 | 294 | 325 | 346 | 418 | 450 | 453 |
| 219 | CERC2645 | <i>C. manginecans</i>   | China, GD | <i>Eucalyptus</i> sp. | 201 | 221 | 252 | 250 | 294 | 325 | 346 | 418 | 450 | 453 |
| 220 | CERC2624 | <i>C. manginecans</i>   | China, GD | <i>Eucalyptus</i> sp. | 206 | 221 | 249 | 250 | 300 | 325 | 346 | 418 | 447 | 453 |
| 221 | CERC2625 | <i>C. manginecans</i>   | China, GD | <i>Eucalyptus</i> sp. | 206 | 221 | 249 | 250 | 300 | 325 | 346 | 418 | 447 | 453 |
| 222 | CERC2626 | <i>C. manginecans</i>   | China, GD | <i>Eucalyptus</i> sp. | 206 | 221 | 249 | 250 | 300 | 325 | 346 | 418 | 447 | 453 |
| 223 | CERC2589 | <i>C. eucalypticola</i> | China, GD | <i>Eucalyptus</i> sp. | 198 | 218 | 249 | 250 | 300 | 325 | 352 | 412 | 450 | 447 |
| 224 | CERC2590 | <i>C. eucalypticola</i> | China, GD | <i>Eucalyptus</i> sp. | 198 | 218 | 249 | 250 | 300 | 325 | 352 | 412 | 450 | 447 |
| 225 | CERC2591 | <i>C. eucalypticola</i> | China, GD | <i>Eucalyptus</i> sp. | 198 | 218 | 249 | 250 | 300 | 325 | 352 | 412 | 450 | 447 |
| 226 | CERC2592 | <i>C. eucalypticola</i> | China, GD | <i>Eucalyptus</i> sp. | 198 | 218 | 249 | 250 | 300 | 325 | 352 | 412 | 450 | 447 |
| 227 | CERC2613 | <i>C. eucalypticola</i> | China, GD | <i>Eucalyptus</i> sp. | 198 | 218 | 249 | 250 | 300 | 325 | 352 | 412 | 450 | 447 |
| 228 | CERC2614 | <i>C. eucalypticola</i> | China, GD | <i>Eucalyptus</i> sp. | 198 | 218 | 249 | 250 | 300 | 325 | 352 | 412 | 450 | 447 |
| 229 | CERC2615 | <i>C. eucalypticola</i> | China, GD | <i>Eucalyptus</i> sp. | 198 | 218 | 249 | 250 | 300 | 325 | 352 | 412 | 450 | 447 |
| 230 | CERC2616 | <i>C. eucalypticola</i> | China, GD | <i>Eucalyptus</i> sp. | 198 | 218 | 249 | 250 | 300 | 325 | 352 | 412 | 450 | 447 |
| 231 | CERC2617 | <i>C. eucalypticola</i> | China, GD | <i>Eucalyptus</i> sp. | 198 | 218 | 249 | 250 | 300 | 325 | 352 | 412 | 450 | 447 |
| 232 | CERC2618 | <i>C. eucalypticola</i> | China, GD | <i>Eucalyptus</i> sp. | 198 | 218 | 249 | 250 | 300 | 325 | 352 | 412 | 450 | 447 |
| 233 | CERC2619 | <i>C. eucalypticola</i> | China, GD | <i>Eucalyptus</i> sp. | 198 | 218 | 249 | 250 | 300 | 325 | 352 | 412 | 450 | 447 |
| 234 | CERC2622 | <i>C. eucalypticola</i> | China, GD | <i>Eucalyptus</i> sp. | 198 | 218 | 249 | 250 | 300 | 325 | 352 | 412 | 450 | 447 |
| 235 | CERC2623 | <i>C. eucalypticola</i> | China, GD | <i>Eucalyptus</i> sp. | 198 | 218 | 249 | 250 | 300 | 325 | 352 | 412 | 450 | 447 |
| 236 | CERC2627 | <i>C. eucalypticola</i> | China, GD | <i>Eucalyptus</i> sp. | 198 | 218 | 252 | 262 | 300 | 325 | 349 | 412 | 455 | 447 |
| 237 | CERC2628 | <i>C. eucalypticola</i> | China, GD | <i>Eucalyptus</i> sp. | 198 | 218 | 252 | 262 | 300 | 325 | 349 | 412 | 455 | 447 |
| 238 | CERC2593 | <i>C. eucalypticola</i> | China, GD | <i>Eucalyptus</i> sp. | 198 | 218 | 252 | 262 | 300 | 325 | 343 | 412 | 455 | 447 |
| 239 | CERC2594 | <i>C. eucalypticola</i> | China, GD | <i>Eucalyptus</i> sp. | 198 | 218 | 252 | 262 | 300 | 325 | 343 | 412 | 455 | 447 |
| 240 | CERC2595 | <i>C. eucalypticola</i> | China, GD | <i>Eucalyptus</i> sp. | 198 | 218 | 252 | 262 | 300 | 325 | 343 | 412 | 455 | 447 |
| 241 | CERC2596 | <i>C. eucalypticola</i> | China, GD | <i>Eucalyptus</i> sp. | 198 | 218 | 252 | 262 | 300 | 325 | 343 | 412 | 455 | 447 |
| 242 | CERC2597 | <i>C. eucalypticola</i> | China, GD | <i>Eucalyptus</i> sp. | 198 | 218 | 252 | 262 | 300 | 325 | 343 | 412 | 455 | 447 |
| 243 | CERC2598 | <i>C. eucalypticola</i> | China, GD | <i>Eucalyptus</i> sp. | 198 | 218 | 252 | 262 | 300 | 325 | 343 | 412 | 455 | 447 |
| 244 | CERC2599 | <i>C. eucalypticola</i> | China, GD | <i>Eucalyptus</i> sp. | 198 | 218 | 252 | 262 | 300 | 325 | 343 | 412 | 455 | 447 |
| 245 | CERC2587 | <i>C. eucalypticola</i> | China, GD | <i>Eucalyptus</i> sp. | 198 | 218 | 252 | 262 | 300 | 328 | 349 | 412 | 450 | 447 |
| 246 | CERC2588 | <i>C. eucalypticola</i> | China, GD | <i>Eucalyptus</i> sp. | 198 | 218 | 252 | 262 | 300 | 328 | 349 | 412 | 450 | 447 |
| 247 | CERC2606 | <i>C. eucalypticola</i> | China, GD | <i>Eucalyptus</i> sp. | 198 | 218 | 252 | 262 | 300 | 328 | 349 | 412 | 450 | 447 |
| 248 | CERC2607 | <i>C. eucalypticola</i> | China, GD | <i>Eucalyptus</i> sp. | 198 | 218 | 252 | 262 | 300 | 328 | 349 | 412 | 450 | 447 |
| 249 | CERC2608 | <i>C. eucalypticola</i> | China, GD | <i>Eucalyptus</i> sp. | 198 | 218 | 252 | 262 | 300 | 328 | 349 | 412 | 450 | 447 |
| 250 | CERC2009 | <i>C. eucalypticola</i> | China, GX | <i>Eucalyptus</i> sp. | 201 | 218 | 252 | 250 | 300 | 325 | 349 | 412 | 455 | 450 |

|     |          |                         |           |                       |     |     |     |     |     |     |     |     |     |     |
|-----|----------|-------------------------|-----------|-----------------------|-----|-----|-----|-----|-----|-----|-----|-----|-----|-----|
| 251 | CERC2010 | <i>C. eucalypticola</i> | China, GX | <i>Eucalyptus</i> sp. | 201 | 218 | 252 | 250 | 300 | 325 | 349 | 412 | 455 | 450 |
| 252 | CERC2011 | <i>C. eucalypticola</i> | China, GX | <i>Eucalyptus</i> sp. | 201 | 218 | 252 | 250 | 300 | 325 | 349 | 412 | 455 | 450 |
| 253 | CERC2012 | <i>C. eucalypticola</i> | China, GX | <i>Eucalyptus</i> sp. | 201 | 218 | 252 | 250 | 300 | 325 | 349 | 412 | 455 | 450 |
| 254 | CERC2013 | <i>C. eucalypticola</i> | China, GX | <i>Eucalyptus</i> sp. | 201 | 218 | 252 | 250 | 300 | 325 | 349 | 412 | 455 | 450 |
| 255 | CERC2016 | <i>C. eucalypticola</i> | China, GX | <i>Eucalyptus</i> sp. | 201 | 218 | 252 | 250 | 300 | 325 | 349 | 412 | 455 | 450 |
| 256 | CERC2017 | <i>C. eucalypticola</i> | China, GX | <i>Eucalyptus</i> sp. | 201 | 218 | 252 | 250 | 300 | 325 | 349 | 412 | 455 | 450 |
| 257 | CERC2103 | <i>C. eucalypticola</i> | China, HN | <i>Eucalyptus</i> sp. | 201 | 218 | 249 | 250 | 300 | 325 | 349 | 412 | 455 | 447 |
| 258 | CERC2104 | <i>C. eucalypticola</i> | China, HN | <i>Eucalyptus</i> sp. | 201 | 218 | 249 | 250 | 300 | 325 | 349 | 412 | 455 | 447 |
| 259 | CERC2105 | <i>C. eucalypticola</i> | China, HN | <i>Eucalyptus</i> sp. | 201 | 218 | 249 | 250 | 300 | 325 | 349 | 412 | 455 | 447 |
| 260 | CERC2106 | <i>C. eucalypticola</i> | China, HN | <i>Eucalyptus</i> sp. | 201 | 218 | 249 | 250 | 300 | 325 | 349 | 412 | 455 | 447 |
| 261 | CERC2107 | <i>C. eucalypticola</i> | China, HN | <i>Eucalyptus</i> sp. | 201 | 218 | 249 | 250 | 300 | 325 | 349 | 412 | 455 | 447 |
| 262 | CERC2109 | <i>C. eucalypticola</i> | China, HN | <i>Eucalyptus</i> sp. | 201 | 218 | 249 | 250 | 300 | 325 | 349 | 412 | 455 | 447 |
| 263 | CERC2110 | <i>C. eucalypticola</i> | China, HN | <i>Eucalyptus</i> sp. | 201 | 218 | 249 | 250 | 300 | 325 | 349 | 412 | 455 | 447 |
| 264 | CERC2111 | <i>C. eucalypticola</i> | China, HN | <i>Eucalyptus</i> sp. | 201 | 218 | 249 | 250 | 300 | 325 | 349 | 412 | 455 | 447 |
| 265 | CERC2113 | <i>C. eucalypticola</i> | China, HN | <i>Eucalyptus</i> sp. | 201 | 218 | 249 | 250 | 300 | 325 | 349 | 412 | 455 | 447 |
| 266 | CERC2115 | <i>C. eucalypticola</i> | China, HN | <i>Eucalyptus</i> sp. | 201 | 218 | 249 | 250 | 300 | 325 | 349 | 412 | 455 | 447 |
| 267 | CERC2068 | <i>C. eucalypticola</i> | China, HN | <i>Eucalyptus</i> sp. | 201 | 218 | 249 | 250 | 300 | 325 | 349 | 412 | 450 | 447 |
| 268 | CERC2070 | <i>C. eucalypticola</i> | China, HN | <i>Eucalyptus</i> sp. | 201 | 218 | 249 | 250 | 300 | 325 | 349 | 412 | 450 | 447 |
| 269 | CERC2074 | <i>C. eucalypticola</i> | China, HN | <i>Eucalyptus</i> sp. | 201 | 218 | 249 | 250 | 300 | 325 | 349 | 412 | 450 | 447 |
| 270 | CERC2076 | <i>C. eucalypticola</i> | China, HN | <i>Eucalyptus</i> sp. | 201 | 218 | 249 | 250 | 300 | 325 | 349 | 412 | 450 | 447 |
| 271 | CERC2079 | <i>C. eucalypticola</i> | China, HN | <i>Eucalyptus</i> sp. | 201 | 218 | 249 | 250 | 300 | 325 | 349 | 412 | 450 | 447 |
| 272 | CERC2080 | <i>C. eucalypticola</i> | China, HN | <i>Eucalyptus</i> sp. | 201 | 218 | 249 | 250 | 300 | 325 | 349 | 412 | 450 | 447 |
| 273 | CERC2082 | <i>C. eucalypticola</i> | China, HN | <i>Eucalyptus</i> sp. | 201 | 218 | 249 | 250 | 300 | 325 | 349 | 412 | 450 | 447 |
| 274 | CERC2084 | <i>C. eucalypticola</i> | China, HN | <i>Eucalyptus</i> sp. | 201 | 218 | 249 | 250 | 300 | 325 | 349 | 412 | 450 | 447 |
| 275 | CERC2085 | <i>C. eucalypticola</i> | China, HN | <i>Eucalyptus</i> sp. | 201 | 218 | 249 | 250 | 300 | 325 | 349 | 412 | 450 | 447 |
| 276 | CERC2088 | <i>C. eucalypticola</i> | China, HN | <i>Eucalyptus</i> sp. | 201 | 218 | 249 | 250 | 300 | 325 | 349 | 412 | 450 | 447 |
| 277 | CERC2089 | <i>C. eucalypticola</i> | China, HN | <i>Eucalyptus</i> sp. | 201 | 218 | 249 | 250 | 300 | 325 | 349 | 412 | 450 | 447 |
| 278 | CERC2097 | <i>C. eucalypticola</i> | China, HN | <i>Eucalyptus</i> sp. | 201 | 218 | 249 | 250 | 300 | 325 | 349 | 412 | 450 | 447 |
| 279 | CERC2101 | <i>C. eucalypticola</i> | China, HN | <i>Eucalyptus</i> sp. | 201 | 218 | 249 | 250 | 300 | 325 | 349 | 412 | 450 | 447 |
| 280 | CERC2102 | <i>C. eucalypticola</i> | China, HN | <i>Eucalyptus</i> sp. | 201 | 218 | 249 | 250 | 300 | 325 | 349 | 412 | 450 | 447 |
| 281 | CERC2190 | <i>C. eucalypticola</i> | China, HN | <i>Eucalyptus</i> sp. | 201 | 218 | 252 | 262 | 300 | 325 | 349 | 412 | 455 | 447 |
| 282 | CERC2191 | <i>C. eucalypticola</i> | China, HN | <i>Eucalyptus</i> sp. | 201 | 218 | 252 | 262 | 300 | 325 | 349 | 412 | 455 | 447 |
| 283 | CERC2192 | <i>C. eucalypticola</i> | China, HN | <i>Eucalyptus</i> sp. | 201 | 218 | 252 | 262 | 300 | 325 | 349 | 412 | 455 | 447 |

|     |          |                         |           |                         |     |     |     |     |     |     |     |     |     |     |
|-----|----------|-------------------------|-----------|-------------------------|-----|-----|-----|-----|-----|-----|-----|-----|-----|-----|
| 284 | CERC2193 | <i>C. eucalypticola</i> | China, HN | <i>Eucalyptus</i> sp.   | 201 | 218 | 252 | 262 | 300 | 325 | 349 | 412 | 455 | 447 |
| 285 | CERC2194 | <i>C. eucalypticola</i> | China, HN | <i>Eucalyptus</i> sp.   | 201 | 218 | 252 | 262 | 300 | 325 | 349 | 412 | 455 | 447 |
| 286 | CERC2195 | <i>C. eucalypticola</i> | China, HN | <i>Eucalyptus</i> sp.   | 201 | 218 | 252 | 262 | 300 | 325 | 349 | 412 | 455 | 447 |
| 287 | CERC2196 | <i>C. eucalypticola</i> | China, HN | <i>Eucalyptus</i> sp.   | 201 | 218 | 252 | 262 | 300 | 325 | 349 | 412 | 455 | 447 |
| 288 | CERC2126 | <i>C. eucalypticola</i> | China, HN | <i>Eucalyptus</i> sp.   | 201 | 218 | 252 | 262 | 300 | 325 | 343 | 412 | 455 | 447 |
| 289 | CERC2127 | <i>C. eucalypticola</i> | China, HN | <i>Eucalyptus</i> sp.   | 201 | 218 | 252 | 262 | 300 | 325 | 343 | 412 | 455 | 447 |
| 290 | CERC2129 | <i>C. eucalypticola</i> | China, HN | <i>Eucalyptus</i> sp.   | 201 | 218 | 252 | 262 | 300 | 325 | 343 | 412 | 455 | 447 |
| 291 | CERC2121 | <i>C. eucalypticola</i> | China, HN | <i>Eucalyptus</i> sp.   | 201 | 218 | 255 | 262 | 300 | 325 | 349 | 412 | 455 | 447 |
| 292 | CERC2122 | <i>C. eucalypticola</i> | China, HN | <i>Eucalyptus</i> sp.   | 201 | 218 | 255 | 262 | 300 | 325 | 349 | 412 | 455 | 447 |
| 293 | CERC2123 | <i>C. eucalypticola</i> | China, HN | <i>Eucalyptus</i> sp.   | 201 | 218 | 255 | 262 | 300 | 325 | 349 | 412 | 455 | 447 |
| 294 | CERC2124 | <i>C. eucalypticola</i> | China, HN | <i>Eucalyptus</i> sp.   | 201 | 218 | 255 | 262 | 300 | 325 | 349 | 412 | 455 | 447 |
| 295 | CERC2125 | <i>C. eucalypticola</i> | China, HN | <i>Eucalyptus</i> sp.   | 201 | 218 | 255 | 262 | 300 | 325 | 349 | 412 | 455 | 447 |
| 296 | CERC2116 | <i>C. eucalypticola</i> | China, HN | <i>Eucalyptus</i> sp.   | 206 | 218 | 252 | 262 | 300 | 325 | 349 | 412 | 455 | 420 |
| 297 | CERC2117 | <i>C. eucalypticola</i> | China, HN | <i>Eucalyptus</i> sp.   | 206 | 218 | 252 | 262 | 300 | 325 | 349 | 412 | 455 | 420 |
| 298 | CERC2118 | <i>C. eucalypticola</i> | China, HN | <i>Eucalyptus</i> sp.   | 206 | 218 | 252 | 262 | 300 | 325 | 349 | 412 | 455 | 420 |
| 299 | CERC2119 | <i>C. eucalypticola</i> | China, HN | <i>Eucalyptus</i> sp.   | 206 | 218 | 252 | 262 | 300 | 325 | 349 | 412 | 455 | 420 |
| 300 | CERC2120 | <i>C. eucalypticola</i> | China, HN | <i>Eucalyptus</i> sp.   | 206 | 218 | 252 | 262 | 300 | 325 | 349 | 412 | 455 | 420 |
| 301 | CERC2128 | <i>C. eucalypticola</i> | China, HN | <i>Eucalyptus</i> sp.   | 206 | 218 | 252 | 250 | 300 | 325 | 343 | 412 | 455 | 447 |
| 302 | CERC5510 | <i>C. eucalypticola</i> | China, YN | <i>Eucalyptus</i> sp.   | 201 | 218 | 249 | 262 | 300 | 325 | 349 | 412 | 455 | 420 |
| 303 | CERC5512 | <i>C. eucalypticola</i> | China, YN | <i>Eucalyptus</i> sp.   | 201 | 218 | 249 | 262 | 300 | 325 | 349 | 412 | 455 | 420 |
| 304 | CERC5515 | <i>C. eucalypticola</i> | China, YN | <i>Eucalyptus</i> sp.   | 201 | 218 | 249 | 262 | 300 | 325 | 349 | 412 | 455 | 420 |
| 305 | CMW4781  | <i>C. eucalypticola</i> | Congo     | <i>Eucalyptus</i> clone | 201 | 218 | 249 | 250 | 300 | 325 | 346 | 412 | 450 | 426 |
| 306 | CMW4786  | <i>C. eucalypticola</i> | Congo     | <i>Eucalyptus</i> clone | 201 | 218 | 249 | 250 | 300 | 325 | 346 | 412 | 450 | 426 |
| 307 | CMW4787  | <i>C. eucalypticola</i> | Congo     | <i>Eucalyptus</i> clone | 201 | 218 | 249 | 250 | 300 | 325 | 346 | 412 | 450 | 426 |
| 308 | CMW4788  | <i>C. eucalypticola</i> | Congo     | <i>Eucalyptus</i> clone | 201 | 218 | 249 | 250 | 300 | 325 | 346 | 412 | 450 | 426 |
| 309 | CMW4791  | <i>C. eucalypticola</i> | Congo     | <i>Eucalyptus</i> clone | 201 | 218 | 249 | 250 | 300 | 325 | 346 | 412 | 450 | 426 |
| 310 | CMW4797  | <i>C. eucalypticola</i> | Congo     | <i>Eucalyptus</i> clone | 201 | 218 | 249 | 250 | 300 | 325 | 346 | 412 | 450 | 426 |
| 311 | CMW4799  | <i>C. eucalypticola</i> | Congo     | <i>Eucalyptus</i> clone | 201 | 218 | 249 | 250 | 300 | 325 | 346 | 412 | 450 | 426 |
| 312 | CMW4800  | <i>C. eucalypticola</i> | Congo     | <i>Eucalyptus</i> clone | 201 | 218 | 249 | 250 | 300 | 325 | 346 | 412 | 450 | 426 |
| 313 | CMW4803  | <i>C. eucalypticola</i> | Congo     | <i>Eucalyptus</i> clone | 201 | 218 | 249 | 250 | 300 | 325 | 346 | 412 | 450 | 426 |
| 314 | CMW4808  | <i>C. eucalypticola</i> | Congo     | <i>Eucalyptus</i> clone | 201 | 218 | 249 | 250 | 300 | 325 | 346 | 412 | 450 | 426 |
| 315 | CMW4809  | <i>C. eucalypticola</i> | Congo     | <i>Eucalyptus</i> clone | 201 | 218 | 249 | 250 | 300 | 325 | 346 | 412 | 450 | 426 |
| 316 | CMW4748  | <i>C. eucalypticola</i> | Congo     | <i>Eucalyptus</i> clone | 201 | 218 | 237 | 250 | 300 | 325 | 346 | 412 | 447 | 426 |

|     |          |                         |           |                         |     |     |     |     |     |     |     |     |     |     |
|-----|----------|-------------------------|-----------|-------------------------|-----|-----|-----|-----|-----|-----|-----|-----|-----|-----|
| 317 | CMW4782  | <i>C. eucalypticola</i> | Congo     | <i>Eucalyptus</i> clone | 201 | 218 | 237 | 250 | 300 | 325 | 346 | 412 | 447 | 426 |
| 318 | CMW4785  | <i>C. eucalypticola</i> | Congo     | <i>Eucalyptus</i> clone | 201 | 218 | 237 | 250 | 300 | 325 | 346 | 412 | 447 | 426 |
| 319 | CMW4794  | <i>C. eucalypticola</i> | Congo     | <i>Eucalyptus</i> clone | 201 | 218 | 237 | 250 | 300 | 325 | 346 | 412 | 447 | 426 |
| 320 | CMW4795  | <i>C. eucalypticola</i> | Congo     | <i>Eucalyptus</i> clone | 201 | 218 | 237 | 250 | 300 | 325 | 346 | 412 | 447 | 426 |
| 321 | CMW4796  | <i>C. eucalypticola</i> | Congo     | <i>Eucalyptus</i> clone | 201 | 218 | 237 | 250 | 300 | 325 | 346 | 412 | 447 | 426 |
| 322 | CMW4802  | <i>C. eucalypticola</i> | Congo     | <i>Eucalyptus</i> clone | 201 | 218 | 237 | 250 | 300 | 325 | 346 | 412 | 447 | 426 |
| 323 | CMW4804  | <i>C. eucalypticola</i> | Congo     | <i>Eucalyptus</i> clone | 201 | 218 | 237 | 250 | 300 | 325 | 346 | 412 | 447 | 426 |
| 324 | CMW4806  | <i>C. eucalypticola</i> | Congo     | <i>Eucalyptus</i> clone | 201 | 218 | 237 | 250 | 300 | 325 | 346 | 412 | 447 | 426 |
| 325 | CMW4807  | <i>C. eucalypticola</i> | Congo     | <i>Eucalyptus</i> clone | 201 | 218 | 237 | 250 | 300 | 325 | 346 | 412 | 447 | 426 |
| 326 | CMW4810  | <i>C. eucalypticola</i> | Congo     | <i>Eucalyptus</i> clone | 201 | 218 | 237 | 250 | 300 | 325 | 346 | 412 | 447 | 426 |
| 327 | CMW14628 | <i>C. eucalypticola</i> | Indonesia | <i>Eucalyptus</i> sp.   | 201 | 218 | 249 | 262 | 300 | 325 | 349 | 412 | 455 | 420 |
| 328 | CMW18563 | <i>C. eucalypticola</i> | Indonesia | <i>Eucalyptus</i> sp.   | 201 | 218 | 249 | 262 | 300 | 325 | 349 | 412 | 455 | 420 |
| 329 | CMW18564 | <i>C. eucalypticola</i> | Indonesia | <i>Eucalyptus</i> sp.   | 201 | 218 | 249 | 262 | 300 | 325 | 349 | 412 | 455 | 420 |
| 330 | CMW18572 | <i>C. eucalypticola</i> | Indonesia | <i>Eucalyptus</i> sp.   | 201 | 218 | 249 | 262 | 300 | 325 | 349 | 412 | 455 | 420 |
| 331 | CMW18573 | <i>C. eucalypticola</i> | Indonesia | <i>Eucalyptus</i> sp.   | 201 | 218 | 249 | 262 | 300 | 325 | 349 | 412 | 455 | 420 |
| 332 | CMW20621 | <i>C. eucalypticola</i> | Indonesia | <i>Eucalyptus</i> sp.   | 201 | 218 | 249 | 262 | 300 | 325 | 349 | 412 | 455 | 420 |
| 333 | CMW20626 | <i>C. eucalypticola</i> | Indonesia | <i>Eucalyptus</i> sp.   | 201 | 218 | 249 | 262 | 300 | 325 | 349 | 412 | 455 | 420 |
| 334 | CMW20628 | <i>C. eucalypticola</i> | Indonesia | <i>Eucalyptus</i> sp.   | 201 | 218 | 249 | 262 | 300 | 325 | 349 | 412 | 455 | 420 |
| 335 | CMW20629 | <i>C. eucalypticola</i> | Indonesia | <i>Eucalyptus</i> sp.   | 201 | 218 | 249 | 262 | 300 | 325 | 349 | 412 | 455 | 420 |
| 336 | CMW20636 | <i>C. eucalypticola</i> | Indonesia | <i>Eucalyptus</i> sp.   | 201 | 218 | 249 | 262 | 300 | 325 | 349 | 412 | 455 | 420 |
| 337 | CMW20637 | <i>C. eucalypticola</i> | Indonesia | <i>Eucalyptus</i> sp.   | 201 | 218 | 249 | 262 | 300 | 325 | 349 | 412 | 455 | 420 |
| 338 | CMW20640 | <i>C. eucalypticola</i> | Indonesia | <i>Eucalyptus</i> sp.   | 201 | 218 | 249 | 262 | 300 | 325 | 349 | 412 | 455 | 420 |
| 339 | CMW20641 | <i>C. eucalypticola</i> | Indonesia | <i>Eucalyptus</i> sp.   | 201 | 218 | 249 | 262 | 300 | 325 | 349 | 412 | 455 | 420 |
| 340 | CMW20663 | <i>C. eucalypticola</i> | Indonesia | <i>Eucalyptus</i> sp.   | 201 | 218 | 249 | 262 | 300 | 325 | 349 | 412 | 455 | 420 |
| 341 | CMW20665 | <i>C. eucalypticola</i> | Indonesia | <i>Eucalyptus</i> sp.   | 201 | 218 | 249 | 262 | 300 | 325 | 349 | 412 | 455 | 420 |
| 342 | CMW21034 | <i>C. manginecans</i>   | Indonesia | <i>Eucalyptus</i> sp.   | 201 | 218 | 249 | 262 | 300 | 325 | 349 | 412 | 455 | 420 |
| 343 | CMW20632 | <i>C. eucalypticola</i> | Indonesia | <i>Eucalyptus</i> sp.   | 201 | 221 | 249 | 262 | 300 | 325 | 349 | 412 | 455 | 420 |
| 344 | CMW20972 | <i>C. manginecans</i>   | Indonesia | <i>Eucalyptus</i> sp.   | 206 | 218 | 243 | 262 | 300 | 325 | 346 | 412 | 447 | 456 |
| 345 | CMW20977 | <i>C. manginecans</i>   | Indonesia | <i>Eucalyptus</i> sp.   | 206 | 218 | 243 | 262 | 300 | 325 | 346 | 412 | 447 | 456 |
| 346 | CMW18577 | <i>C. eucalypticola</i> | Indonesia | <i>Eucalyptus</i> sp.   | 206 | 221 | 249 | 262 | 300 | 325 | 349 | 418 | 447 | 453 |
| 347 | CMW20638 | <i>C. eucalypticola</i> | Indonesia | <i>Eucalyptus</i> sp.   | 206 | 221 | 249 | 262 | 300 | 325 | 349 | 418 | 447 | 450 |
| 348 | CMW20648 | <i>C. eucalypticola</i> | Indonesia | <i>Eucalyptus</i> sp.   | 206 | 221 | 249 | 262 | 294 | 325 | 349 | 418 | 447 | 453 |
| 349 | CMW21044 | <i>C. manginecans</i>   | Indonesia | <i>Eucalyptus</i> sp.   | 206 | 221 | 243 | 262 | 300 | 325 | 349 | 412 | 447 | 453 |

|     |          |                         |              |                           |     |     |     |     |     |     |     |     |     |     |
|-----|----------|-------------------------|--------------|---------------------------|-----|-----|-----|-----|-----|-----|-----|-----|-----|-----|
| 350 | CMW21046 | <i>C. manginecans</i>   | Indonesia    | <i>Eucalyptus</i> sp.     | 206 | 221 | 243 | 262 | 300 | 325 | 349 | 412 | 447 | 453 |
| 351 | CMW21028 | <i>C. manginecans</i>   | Indonesia    | <i>Eucalyptus</i> sp.     | 206 | 221 | 243 | 262 | 300 | 325 | 349 | 418 | 447 | 453 |
| 352 | CMW21048 | <i>C. manginecans</i>   | Indonesia    | <i>Eucalyptus</i> sp.     | 206 | 221 | 243 | 262 | 300 | 325 | 349 | 418 | 447 | 453 |
| 353 | CMW21025 | <i>C. eucalypticola</i> | Indonesia    | <i>Eucalyptus</i> sp.     | 206 | 221 | 243 | 262 | 303 | 325 | 349 | 418 | 447 | 453 |
| 354 | CMW21049 | <i>C. eucalypticola</i> | Indonesia    | <i>Eucalyptus</i> sp.     | 206 | 221 | 243 | 262 | 303 | 325 | 349 | 418 | 447 | 453 |
| 355 | CMW13030 | <i>C. eucalypticola</i> | South Africa | <i>Eucalyptus</i> sp.     | 201 | 218 | 249 | 250 | 300 | 325 | 349 | 412 | 452 | 447 |
| 356 | CMW15062 | <i>C. eucalypticola</i> | South Africa | <i>Eucalyptus</i> sp.     | 201 | 218 | 249 | 250 | 300 | 325 | 349 | 412 | 452 | 447 |
| 357 | CMW10000 | <i>C. eucalypticola</i> | South Africa | <i>Eucalyptus grandis</i> | 201 | 218 | 252 | 250 | 300 | 325 | 349 | 412 | 450 | 447 |
| 358 | CMW12277 | <i>C. eucalypticola</i> | South Africa | <i>E. grandis</i>         | 201 | 218 | 252 | 250 | 300 | 325 | 349 | 412 | 450 | 447 |
| 359 | CMW12666 | <i>C. eucalypticola</i> | South Africa | <i>E. grandis</i>         | 201 | 218 | 252 | 250 | 300 | 325 | 349 | 412 | 450 | 447 |
| 360 | CMW13019 | <i>C. eucalypticola</i> | South Africa | <i>Eucalyptus</i> sp.     | 201 | 218 | 252 | 250 | 300 | 325 | 349 | 412 | 450 | 447 |
| 361 | CMW13022 | <i>C. eucalypticola</i> | South Africa | <i>Eucalyptus</i> sp.     | 201 | 218 | 252 | 250 | 300 | 325 | 349 | 412 | 450 | 447 |
| 362 | CMW13023 | <i>C. eucalypticola</i> | South Africa | <i>Eucalyptus</i> sp.     | 201 | 218 | 252 | 250 | 300 | 325 | 349 | 412 | 450 | 447 |
| 363 | CMW13027 | <i>C. eucalypticola</i> | South Africa | <i>Eucalyptus</i> sp.     | 201 | 218 | 252 | 250 | 300 | 325 | 349 | 412 | 450 | 447 |
| 364 | CMW13028 | <i>C. eucalypticola</i> | South Africa | <i>Eucalyptus</i> sp.     | 201 | 218 | 252 | 250 | 300 | 325 | 349 | 412 | 450 | 447 |
| 365 | CMW13040 | <i>C. eucalypticola</i> | South Africa | <i>Eucalyptus</i> sp.     | 201 | 218 | 252 | 250 | 300 | 325 | 349 | 412 | 450 | 447 |
| 366 | CMW13041 | <i>C. eucalypticola</i> | South Africa | <i>Eucalyptus</i> sp.     | 201 | 218 | 252 | 250 | 300 | 325 | 349 | 412 | 450 | 447 |
| 367 | CMW15061 | <i>C. eucalypticola</i> | South Africa | <i>E. grandis</i>         | 201 | 218 | 252 | 250 | 300 | 325 | 349 | 412 | 450 | 447 |
| 368 | CMW9998  | <i>C. eucalypticola</i> | South Africa | <i>E. grandis</i>         | 201 | 218 | 252 | 250 | 300 | 325 | 349 | 412 | 450 | 447 |
| 369 | CMW12276 | <i>C. eucalypticola</i> | South Africa | <i>E. grandis</i>         | 201 | 218 | 252 | 250 | 300 | 325 | 349 | 412 | 452 | 447 |
| 370 | CMW15054 | <i>C. eucalypticola</i> | South Africa | <i>E. grandis</i>         | 198 | 218 | 249 | 250 | 300 | 325 | 349 | 412 | 450 | 453 |
| 371 | CMW11700 | <i>C. eucalypticola</i> | South Africa | <i>E. grandis</i>         | 198 | 218 | 249 | 250 | 300 | 325 | 349 | 412 | 450 | 447 |
| 372 | CMW15053 | <i>C. eucalypticola</i> | South Africa | <i>E. grandis</i>         | 198 | 218 | 249 | 250 | 300 | 325 | 349 | 412 | 450 | 447 |
| 373 | CMW15056 | <i>C. eucalypticola</i> | South Africa | <i>E. grandis</i>         | 198 | 218 | 249 | 250 | 300 | 325 | 349 | 412 | 452 | 447 |
| 374 | CMW15066 | <i>C. eucalypticola</i> | South Africa | <i>E. grandis</i>         | 198 | 218 | 249 | 250 | 300 | 325 | 349 | 412 | 452 | 447 |
| 375 | CMW15067 | <i>C. eucalypticola</i> | South Africa | <i>E. grandis</i>         | 198 | 218 | 249 | 250 | 300 | 325 | 349 | 412 | 452 | 447 |
| 376 | CMW11701 | <i>C. eucalypticola</i> | South Africa | <i>E. grandis</i>         | 198 | 218 | 249 | 250 | 300 | 325 | 349 | 412 | 452 | 450 |
| 377 | CMW15055 | <i>C. eucalypticola</i> | South Africa | <i>E. grandis</i>         | 198 | 218 | 252 | 250 | 300 | 325 | 349 | 412 | 450 | 447 |
| 378 | CMW15058 | <i>C. eucalypticola</i> | South Africa | <i>E. grandis</i>         | 198 | 218 | 252 | 250 | 300 | 325 | 349 | 412 | 450 | 447 |
| 379 | CMW12664 | <i>C. eucalypticola</i> | South Africa | <i>E. grandis</i>         | 198 | 218 | 252 | 250 | 300 | 325 | 349 | 412 | 450 | 450 |
| 380 | CMW12665 | <i>C. eucalypticola</i> | South Africa | <i>E. grandis</i>         | 198 | 218 | 252 | 250 | 300 | 325 | 349 | 412 | 450 | 450 |
| 381 | CMW12670 | <i>C. eucalypticola</i> | South Africa | <i>E. grandis</i>         | 198 | 218 | 252 | 250 | 300 | 325 | 349 | 412 | 450 | 450 |
| 382 | CMW15070 | <i>C. eucalypticola</i> | South Africa | <i>E. grandis</i>         | 198 | 218 | 252 | 250 | 300 | 325 | 349 | 412 | 452 | 453 |

|     |          |                         |           |                         |     |     |     |     |     |     |     |     |     |     |
|-----|----------|-------------------------|-----------|-------------------------|-----|-----|-----|-----|-----|-----|-----|-----|-----|-----|
| 383 | CMW39447 | <i>C. eucalypticola</i> | Uruguay   | <i>E. grandis</i>       | 201 | 218 | 249 | 250 | 300 | 325 | 349 | 412 | 455 | 444 |
| 384 | CMW39484 | <i>C. eucalypticola</i> | Uruguay   | <i>E. grandis</i>       | 201 | 218 | 249 | 250 | 300 | 325 | 349 | 412 | 455 | 444 |
| 385 | CMW39487 | <i>C. eucalypticola</i> | Uruguay   | <i>E. grandis</i>       | 201 | 218 | 249 | 250 | 300 | 325 | 349 | 412 | 455 | 444 |
| 386 | CMW39488 | <i>C. eucalypticola</i> | Uruguay   | <i>E. grandis</i>       | 201 | 218 | 249 | 250 | 300 | 325 | 343 | 412 | 455 | 444 |
| 387 | CMW39442 | <i>C. eucalypticola</i> | Uruguay   | <i>E. grandis</i>       | 201 | 218 | 249 | 250 | 300 | 325 | 352 | 412 | 455 | 447 |
| 388 | CMW39453 | <i>C. eucalypticola</i> | Uruguay   | <i>E. grandis</i>       | 201 | 218 | 249 | 250 | 294 | 325 | 349 | 412 | 455 | 444 |
| 389 | CMW39441 | <i>C. eucalypticola</i> | Uruguay   | <i>E. grandis</i>       | 201 | 218 | 249 | 250 | 294 | 325 | 352 | 412 | 455 | 447 |
| 390 | CMW15313 | <i>C. manginecans</i>   | Oman      | <i>Mangifera indica</i> | 206 | 221 | 243 | 250 | 294 | 322 | 346 | 418 | 447 | 438 |
| 391 | CMW15314 | <i>C. manginecans</i>   | Oman      | <i>M. indica</i>        | 206 | 221 | 243 | 250 | 294 | 322 | 346 | 418 | 447 | 438 |
| 392 | CMW15315 | <i>C. manginecans</i>   | Oman      | <i>M. indica</i>        | 206 | 221 | 243 | 250 | 294 | 322 | 346 | 418 | 447 | 438 |
| 393 | CMW15316 | <i>C. manginecans</i>   | Oman      | <i>M. indica</i>        | 206 | 221 | 243 | 250 | 294 | 322 | 346 | 418 | 447 | 438 |
| 394 | CMW15317 | <i>C. manginecans</i>   | Oman      | <i>M. indica</i>        | 206 | 221 | 243 | 250 | 294 | 322 | 346 | 418 | 447 | 438 |
| 395 | CMW15353 | <i>C. manginecans</i>   | Oman      | <i>M. indica</i>        | 206 | 221 | 243 | 250 | 294 | 322 | 346 | 418 | 447 | 438 |
| 396 | CMW15366 | <i>C. manginecans</i>   | Oman      | <i>M. indica</i>        | 206 | 221 | 243 | 250 | 294 | 322 | 346 | 418 | 447 | 438 |
| 397 | CMW15369 | <i>C. manginecans</i>   | Oman      | <i>M. indica</i>        | 206 | 221 | 243 | 250 | 294 | 322 | 346 | 418 | 447 | 438 |
| 398 | CMW15371 | <i>C. manginecans</i>   | Oman      | <i>M. indica</i>        | 206 | 221 | 243 | 250 | 294 | 322 | 346 | 418 | 447 | 438 |
| 399 | CMW15377 | <i>C. manginecans</i>   | Oman      | <i>M. indica</i>        | 206 | 221 | 243 | 250 | 294 | 322 | 346 | 418 | 447 | 438 |
| 400 | CMW15381 | <i>C. manginecans</i>   | Oman      | <i>M. indica</i>        | 206 | 221 | 243 | 250 | 294 | 322 | 346 | 418 | 447 | 438 |
| 401 | CMW15382 | <i>C. manginecans</i>   | Oman      | <i>M. indica</i>        | 206 | 221 | 243 | 250 | 294 | 322 | 346 | 418 | 447 | 438 |
| 402 | CMW15384 | <i>C. manginecans</i>   | Oman      | <i>M. indica</i>        | 206 | 221 | 243 | 250 | 294 | 322 | 346 | 418 | 447 | 438 |
| 403 | CMW15385 | <i>C. manginecans</i>   | Oman      | <i>M. indica</i>        | 206 | 221 | 243 | 250 | 294 | 322 | 346 | 418 | 447 | 438 |
| 404 | CMW15391 | <i>C. manginecans</i>   | Oman      | <i>M. indica</i>        | 206 | 221 | 243 | 250 | 294 | 322 | 346 | 418 | 447 | 438 |
| 405 | CMW17567 | <i>C. manginecans</i>   | Pakistan  | <i>M. indica</i>        | 206 | 221 | 243 | 250 | 294 | 322 | 346 | 418 | 447 | 438 |
| 406 | CMW23628 | <i>C. manginecans</i>   | Pakistan  | <i>M. indica</i>        | 206 | 221 | 243 | 250 | 294 | 322 | 346 | 418 | 447 | 438 |
| 407 | CMW23630 | <i>C. manginecans</i>   | Pakistan  | <i>M. indica</i>        | 206 | 221 | 243 | 250 | 294 | 322 | 346 | 418 | 447 | 438 |
| 408 | CMW23637 | <i>C. manginecans</i>   | Pakistan  | <i>M. indica</i>        | 206 | 221 | 243 | 250 | 294 | 322 | 346 | 418 | 447 | 438 |
| 409 | CMW23642 | <i>C. manginecans</i>   | Pakistan  | <i>M. indica</i>        | 206 | 221 | 243 | 250 | 294 | 322 | 346 | 418 | 447 | 438 |
| 410 | CMW23643 | <i>C. manginecans</i>   | Pakistan  | <i>M. indica</i>        | 206 | 221 | 243 | 250 | 294 | 322 | 346 | 418 | 447 | 438 |
| 411 | CERC7783 | <i>C. eucalypticola</i> | China, SC | <i>Punica granatum</i>  | 201 | 218 | 249 | 262 | 300 | 325 | 349 | 412 | 455 | 420 |
| 412 | CERC7795 | <i>C. eucalypticola</i> | China, SC | <i>P. granatum</i>      | 201 | 218 | 249 | 262 | 300 | 325 | 349 | 412 | 455 | 420 |
| 413 | CERC7806 | <i>C. eucalypticola</i> | China, SC | <i>P. granatum</i>      | 201 | 218 | 249 | 262 | 300 | 325 | 349 | 412 | 455 | 420 |
| 414 | CERC7832 | <i>C. eucalypticola</i> | China, SC | <i>P. granatum</i>      | 201 | 218 | 249 | 262 | 300 | 325 | 349 | 412 | 455 | 420 |
| 415 | CERC7836 | <i>C. eucalypticola</i> | China, SC | <i>P. granatum</i>      | 201 | 218 | 249 | 262 | 300 | 325 | 349 | 412 | 455 | 420 |

|     |          |                         |           |                    |     |     |     |     |     |     |     |     |     |     |
|-----|----------|-------------------------|-----------|--------------------|-----|-----|-----|-----|-----|-----|-----|-----|-----|-----|
| 416 | CERC7845 | <i>C. eucalypticola</i> | China, SC | <i>P. granatum</i> | 201 | 218 | 249 | 262 | 300 | 325 | 349 | 412 | 455 | 420 |
| 417 | CERC7847 | <i>C. eucalypticola</i> | China, SC | <i>P. granatum</i> | 201 | 218 | 249 | 262 | 300 | 325 | 349 | 412 | 455 | 420 |
| 418 | CERC7852 | <i>C. eucalypticola</i> | China, SC | <i>P. granatum</i> | 201 | 218 | 249 | 262 | 300 | 325 | 349 | 412 | 455 | 420 |
| 419 | CERC7853 | <i>C. eucalypticola</i> | China, SC | <i>P. granatum</i> | 201 | 218 | 249 | 262 | 300 | 325 | 349 | 412 | 455 | 420 |
| 420 | CERC7822 | <i>C. eucalypticola</i> | China, SC | <i>P. granatum</i> | 201 | 218 | 249 | 262 | 300 | 325 | 349 | 412 | 455 | 447 |
| 421 | CERC7804 | <i>C. eucalypticola</i> | China, SC | <i>P. granatum</i> | 201 | 218 | 249 | 262 | 300 | 325 | 349 | 412 | 458 | 420 |
| 422 | CERC7810 | <i>C. eucalypticola</i> | China, SC | <i>P. granatum</i> | 201 | 218 | 249 | 262 | 303 | 325 | 349 | 412 | 455 | 420 |
| 423 | CERC7802 | <i>C. eucalypticola</i> | China, SC | <i>P. granatum</i> | 201 | 218 | 249 | 250 | 300 | 325 | 349 | 412 | 455 | 420 |
| 424 | CERC7785 | <i>C. eucalypticola</i> | China, SC | <i>P. granatum</i> | 201 | 218 | 252 | 250 | 300 | 325 | 349 | 412 | 455 | 447 |
| 425 | CERC7789 | <i>C. eucalypticola</i> | China, SC | <i>P. granatum</i> | 201 | 218 | 252 | 250 | 300 | 325 | 349 | 412 | 455 | 447 |
| 426 | CERC7791 | <i>C. eucalypticola</i> | China, SC | <i>P. granatum</i> | 201 | 218 | 252 | 250 | 300 | 325 | 349 | 412 | 455 | 447 |
| 427 | CERC7793 | <i>C. eucalypticola</i> | China, SC | <i>P. granatum</i> | 201 | 218 | 252 | 250 | 300 | 325 | 349 | 412 | 455 | 447 |
| 428 | CERC7798 | <i>C. eucalypticola</i> | China, SC | <i>P. granatum</i> | 201 | 218 | 252 | 250 | 300 | 325 | 349 | 412 | 455 | 447 |
| 429 | CERC7800 | <i>C. eucalypticola</i> | China, SC | <i>P. granatum</i> | 201 | 218 | 252 | 250 | 300 | 325 | 349 | 412 | 455 | 447 |
| 430 | CERC7808 | <i>C. eucalypticola</i> | China, SC | <i>P. granatum</i> | 201 | 218 | 252 | 250 | 300 | 325 | 349 | 412 | 455 | 447 |
| 431 | CERC7812 | <i>C. eucalypticola</i> | China, SC | <i>P. granatum</i> | 201 | 218 | 252 | 250 | 300 | 325 | 349 | 412 | 455 | 447 |
| 432 | CERC7814 | <i>C. eucalypticola</i> | China, SC | <i>P. granatum</i> | 201 | 218 | 252 | 250 | 300 | 325 | 349 | 412 | 455 | 447 |
| 433 | CERC7816 | <i>C. eucalypticola</i> | China, SC | <i>P. granatum</i> | 201 | 218 | 252 | 250 | 300 | 325 | 349 | 412 | 455 | 447 |
| 434 | CERC7818 | <i>C. eucalypticola</i> | China, SC | <i>P. granatum</i> | 201 | 218 | 252 | 250 | 300 | 325 | 349 | 412 | 455 | 447 |
| 435 | CERC7824 | <i>C. eucalypticola</i> | China, SC | <i>P. granatum</i> | 201 | 218 | 252 | 250 | 300 | 325 | 349 | 412 | 455 | 447 |
| 436 | CERC7828 | <i>C. eucalypticola</i> | China, SC | <i>P. granatum</i> | 201 | 218 | 252 | 250 | 300 | 325 | 349 | 412 | 455 | 447 |
| 437 | CERC7830 | <i>C. eucalypticola</i> | China, SC | <i>P. granatum</i> | 201 | 218 | 252 | 250 | 300 | 325 | 349 | 412 | 455 | 447 |
| 438 | CERC7838 | <i>C. eucalypticola</i> | China, SC | <i>P. granatum</i> | 201 | 218 | 252 | 250 | 300 | 325 | 349 | 412 | 455 | 447 |
| 439 | CERC7840 | <i>C. eucalypticola</i> | China, SC | <i>P. granatum</i> | 201 | 218 | 252 | 250 | 300 | 325 | 349 | 412 | 455 | 447 |
| 440 | CERC7841 | <i>C. eucalypticola</i> | China, SC | <i>P. granatum</i> | 201 | 218 | 252 | 250 | 300 | 325 | 349 | 412 | 455 | 447 |
| 441 | CERC7850 | <i>C. eucalypticola</i> | China, SC | <i>P. granatum</i> | 201 | 218 | 252 | 250 | 300 | 325 | 349 | 412 | 455 | 447 |
| 442 | CERC7826 | <i>C. eucalypticola</i> | China, SC | <i>P. granatum</i> | 198 | 218 | 249 | 262 | 300 | 325 | 349 | 412 | 455 | 420 |
| 443 | CERC7843 | <i>C. eucalypticola</i> | China, SC | <i>P. granatum</i> | 198 | 218 | 249 | 262 | 300 | 325 | 349 | 412 | 455 | 420 |
| 444 | CERC3576 | <i>C. eucalypticola</i> | China, YN | <i>P. granatum</i> | 201 | 218 | 249 | 262 | 300 | 325 | 349 | 412 | 455 | 420 |
| 445 | CERC3577 | <i>C. eucalypticola</i> | China, YN | <i>P. granatum</i> | 201 | 218 | 249 | 262 | 300 | 325 | 349 | 412 | 455 | 420 |
| 446 | CERC3597 | <i>C. eucalypticola</i> | China, YN | <i>P. granatum</i> | 201 | 218 | 249 | 262 | 300 | 325 | 349 | 412 | 455 | 420 |
| 447 | CERC5488 | <i>C. eucalypticola</i> | China, YN | <i>P. granatum</i> | 201 | 218 | 249 | 262 | 300 | 325 | 349 | 412 | 455 | 420 |
| 448 | CERC5493 | <i>C. eucalypticola</i> | China, YN | <i>P. granatum</i> | 201 | 218 | 249 | 262 | 300 | 325 | 349 | 412 | 455 | 420 |





|     |          |                         |           |                    |     |     |     |     |     |     |     |     |     |     |
|-----|----------|-------------------------|-----------|--------------------|-----|-----|-----|-----|-----|-----|-----|-----|-----|-----|
| 482 | CERC7735 | <i>C. eucalypticola</i> | China, YN | <i>P. granatum</i> | 198 | 218 | 249 | 262 | 300 | 325 | 349 | 412 | 455 | 420 |
| 483 | CERC7737 | <i>C. eucalypticola</i> | China, YN | <i>P. granatum</i> | 198 | 218 | 249 | 262 | 300 | 325 | 349 | 412 | 455 | 420 |
| 484 | CERC7739 | <i>C. eucalypticola</i> | China, YN | <i>P. granatum</i> | 198 | 218 | 249 | 262 | 300 | 325 | 349 | 412 | 455 | 420 |
| 485 | CERC7743 | <i>C. eucalypticola</i> | China, YN | <i>P. granatum</i> | 198 | 218 | 249 | 262 | 300 | 325 | 349 | 412 | 455 | 420 |
| 486 | CERC7745 | <i>C. eucalypticola</i> | China, YN | <i>P. granatum</i> | 198 | 218 | 249 | 262 | 300 | 325 | 349 | 412 | 455 | 420 |
| 487 | CERC7747 | <i>C. eucalypticola</i> | China, YN | <i>P. granatum</i> | 198 | 218 | 249 | 262 | 300 | 325 | 349 | 412 | 455 | 420 |
| 488 | CERC7749 | <i>C. eucalypticola</i> | China, YN | <i>P. granatum</i> | 198 | 218 | 249 | 262 | 300 | 325 | 349 | 412 | 455 | 420 |
| 489 | CERC7751 | <i>C. eucalypticola</i> | China, YN | <i>P. granatum</i> | 198 | 218 | 249 | 262 | 300 | 325 | 349 | 412 | 455 | 420 |
| 490 | CERC7753 | <i>C. eucalypticola</i> | China, YN | <i>P. granatum</i> | 198 | 218 | 249 | 262 | 300 | 325 | 349 | 412 | 455 | 420 |
| 491 | CERC7696 | <i>C. eucalypticola</i> | China, YN | <i>P. granatum</i> | 198 | 218 | 249 | 266 | 300 | 325 | 349 | 412 | 455 | 420 |

<sup>a</sup>CMW = Culture collection of the Forestry and Agricultural Biotechnology Institute (FABI), University of Pretoria, Pretoria, South Africa; CERC = Culture collection of China Eucalypt Research Centre (CERC), Chinese Academy of Forestry (CAF), ZhanJiang, GuangDong Province, China.

**Supplementary Table S2.** List of *Ceratocystis* isolates included in the microsatellite study and the alleles scored at each locus based on results obtained by sequencing.

|    |                      |                       |           |                       | Panel AF              |                    |                    |                    |                     |                    |                    |                    |                    |                    |                    |
|----|----------------------|-----------------------|-----------|-----------------------|-----------------------|--------------------|--------------------|--------------------|---------------------|--------------------|--------------------|--------------------|--------------------|--------------------|--------------------|
|    |                      |                       |           |                       | AF2                   | AF3                | AF4                | AF5                | AF6                 | AF7                | AF8                | AF9                | AF11               | AF12               |                    |
|    |                      |                       |           |                       | Primer                | VIC                | NED                | PET                | FAM                 | VIC                | NED                | PET                | FAM                | VIC                | PET                |
|    |                      |                       |           |                       | Colour                | Green              | Yellow             | Red                | Blue                | Green              | Yellow             | Red                | Blue               | Green              | Red                |
|    |                      |                       |           |                       | Bin size in Genescan  | 180~230            | 170~270            | 200~280            | 200~300             | 235~320            | 280~370            | 310-380            | 350~460            | 420~490            | 400-480            |
|    |                      |                       |           |                       | Repeat type           | (AGA) <sub>n</sub> | (CTG) <sub>n</sub> | (ACA) <sub>n</sub> | (GTCA) <sub>n</sub> | (GAG) <sub>n</sub> | (AGC) <sub>n</sub> | (GAG) <sub>n</sub> | (GCA) <sub>n</sub> | (ACA) <sub>n</sub> | (ACA) <sub>n</sub> |
|    |                      |                       |           |                       | Dilution              | 1/200              | 1/200              | 1.2/200            | 2.5/200             | 1/200              | 1.2/200            | 1/200              | 1/200              | 1/200              | 1/200              |
|    |                      |                       |           |                       | Annealing temperature | 55°C               | 55°C               | 55°C               | 54°C                | 54°C               | 55°C               | 54°C               | 54°C               | 55°C               | 57°C               |
|    |                      |                       |           |                       | Taq                   | My Taq             | My Taq             | My Taq             | My Taq              | My Taq             | My Taq             | My Taq             | My Taq             | My Taq             | My Taq             |
| Nr | Isolate <sup>a</sup> | Species               | Location  | Host                  |                       |                    |                    |                    |                     |                    |                    |                    |                    |                    |                    |
| 1  | CMW22563             | <i>C. manginecans</i> | Indonesia | <i>Acacia mangium</i> | 204                   | 218                | 250                | 265                | 301                 | 330                | 350                | 416                | 458                | 458                |                    |

|    |          |                       |           |                      |     |     |     |     |     |     |     |     |     |     |
|----|----------|-----------------------|-----------|----------------------|-----|-----|-----|-----|-----|-----|-----|-----|-----|-----|
| 2  | CMW22561 | <i>C. manginecans</i> | Indonesia | <i>A. mangium</i>    | 204 | 218 | 250 | 265 | 301 | 327 | 350 | 416 | 458 | 458 |
| 3  | CMT66    | <i>C. manginecans</i> | Indonesia | <i>A. acaciofora</i> | 210 | 218 | 250 | 265 | 310 | 330 | 350 | 416 | 449 | 458 |
| 4  | CMW22564 | <i>C. manginecans</i> | Indonesia | <i>A. mangium</i>    | 210 | 218 | 244 | 265 | 301 | 330 | 350 | 416 | 449 | 458 |
| 5  | CMT25    | <i>C. manginecans</i> | Indonesia | <i>A. acaciofora</i> | 210 | 218 | 244 | 265 | 301 | 330 | 350 | 416 | 449 | 464 |
| 6  | CMT26    | <i>C. manginecans</i> | Indonesia | <i>A. acaciofora</i> | 210 | 218 | 244 | 265 | 301 | 330 | 350 | 416 | 449 | 464 |
| 7  | CMT29    | <i>C. manginecans</i> | Indonesia | <i>A. acaciofora</i> | 210 | 218 | 244 | 265 | 301 | 330 | 350 | 416 | 449 | 464 |
| 8  | CMT1     | <i>C. manginecans</i> | Indonesia | <i>A. acaciofora</i> | 210 | 218 | 244 | 265 | 301 | 330 | 350 | 422 | 449 | 458 |
| 9  | CMT10    | <i>C. manginecans</i> | Indonesia | <i>A. acaciofora</i> | 210 | 218 | 244 | 265 | 301 | 330 | 350 | 422 | 449 | 458 |
| 10 | CMT100   | <i>C. manginecans</i> | Indonesia | <i>A. acaciofora</i> | 210 | 218 | 244 | 265 | 301 | 330 | 350 | 422 | 449 | 458 |
| 11 | CMT101   | <i>C. manginecans</i> | Indonesia | <i>A. acaciofora</i> | 210 | 218 | 244 | 265 | 301 | 330 | 350 | 422 | 449 | 458 |
| 12 | CMT102   | <i>C. manginecans</i> | Indonesia | <i>A. acaciofora</i> | 210 | 218 | 244 | 265 | 301 | 330 | 350 | 422 | 449 | 458 |
| 13 | CMT103   | <i>C. manginecans</i> | Indonesia | <i>A. acaciofora</i> | 210 | 218 | 244 | 265 | 301 | 330 | 350 | 422 | 449 | 458 |
| 14 | CMT11    | <i>C. manginecans</i> | Indonesia | <i>A. acaciofora</i> | 210 | 218 | 244 | 265 | 301 | 330 | 350 | 422 | 449 | 458 |
| 15 | CMT12    | <i>C. manginecans</i> | Indonesia | <i>A. acaciofora</i> | 210 | 218 | 244 | 265 | 301 | 330 | 350 | 422 | 449 | 458 |
| 16 | CMT13    | <i>C. manginecans</i> | Indonesia | <i>A. acaciofora</i> | 210 | 218 | 244 | 265 | 301 | 330 | 350 | 422 | 449 | 458 |
| 17 | CMT15    | <i>C. manginecans</i> | Indonesia | <i>A. acaciofora</i> | 210 | 218 | 244 | 265 | 301 | 330 | 350 | 422 | 449 | 458 |
| 18 | CMT16    | <i>C. manginecans</i> | Indonesia | <i>A. acaciofora</i> | 210 | 218 | 244 | 265 | 301 | 330 | 350 | 422 | 449 | 458 |
| 19 | CMT17    | <i>C. manginecans</i> | Indonesia | <i>A. acaciofora</i> | 210 | 218 | 244 | 265 | 301 | 330 | 350 | 422 | 449 | 458 |
| 20 | CMT18    | <i>C. manginecans</i> | Indonesia | <i>A. acaciofora</i> | 210 | 218 | 244 | 265 | 301 | 330 | 350 | 422 | 449 | 458 |
| 21 | CMT2     | <i>C. manginecans</i> | Indonesia | <i>A. acaciofora</i> | 210 | 218 | 244 | 265 | 301 | 330 | 350 | 422 | 449 | 458 |
| 22 | CMT20    | <i>C. manginecans</i> | Indonesia | <i>A. acaciofora</i> | 210 | 218 | 244 | 265 | 301 | 330 | 350 | 422 | 449 | 458 |
| 23 | CMT21    | <i>C. manginecans</i> | Indonesia | <i>A. acaciofora</i> | 210 | 218 | 244 | 265 | 301 | 330 | 350 | 422 | 449 | 458 |
| 24 | CMT22    | <i>C. manginecans</i> | Indonesia | <i>A. acaciofora</i> | 210 | 218 | 244 | 265 | 301 | 330 | 350 | 422 | 449 | 458 |
| 25 | CMT24    | <i>C. manginecans</i> | Indonesia | <i>A. acaciofora</i> | 210 | 218 | 244 | 265 | 301 | 330 | 350 | 422 | 449 | 458 |
| 26 | CMT28    | <i>C. manginecans</i> | Indonesia | <i>A. acaciofora</i> | 210 | 218 | 244 | 265 | 301 | 330 | 350 | 422 | 449 | 458 |
| 27 | CMT3     | <i>C. manginecans</i> | Indonesia | <i>A. acaciofora</i> | 210 | 218 | 244 | 265 | 301 | 330 | 350 | 422 | 449 | 458 |
| 28 | CMT30    | <i>C. manginecans</i> | Indonesia | <i>A. acaciofora</i> | 210 | 218 | 244 | 265 | 301 | 330 | 350 | 422 | 449 | 458 |
| 29 | CMT31    | <i>C. manginecans</i> | Indonesia | <i>A. acaciofora</i> | 210 | 218 | 244 | 265 | 301 | 330 | 350 | 422 | 449 | 458 |
| 30 | CMT33    | <i>C. manginecans</i> | Indonesia | <i>A. acaciofora</i> | 210 | 218 | 244 | 265 | 301 | 330 | 350 | 422 | 449 | 458 |
| 31 | CMT35    | <i>C. manginecans</i> | Indonesia | <i>A. acaciofora</i> | 210 | 218 | 244 | 265 | 301 | 330 | 350 | 422 | 449 | 458 |
| 32 | CMT36    | <i>C. manginecans</i> | Indonesia | <i>A. acaciofora</i> | 210 | 218 | 244 | 265 | 301 | 330 | 350 | 422 | 449 | 458 |
| 33 | CMT37    | <i>C. manginecans</i> | Indonesia | <i>A. acaciofora</i> | 210 | 218 | 244 | 265 | 301 | 330 | 350 | 422 | 449 | 458 |
| 34 | CMT38    | <i>C. manginecans</i> | Indonesia | <i>A. acaciofora</i> | 210 | 218 | 244 | 265 | 301 | 330 | 350 | 422 | 449 | 458 |
| 35 | CMT39    | <i>C. manginecans</i> | Indonesia | <i>A. acaciofora</i> | 210 | 218 | 244 | 265 | 301 | 330 | 350 | 422 | 449 | 458 |

|    |          |                       |           |                        |     |     |     |     |     |     |     |     |     |     |
|----|----------|-----------------------|-----------|------------------------|-----|-----|-----|-----|-----|-----|-----|-----|-----|-----|
| 36 | CMT5     | <i>C. manginecans</i> | Indonesia | <i>A. acacinofoora</i> | 210 | 218 | 244 | 265 | 301 | 330 | 350 | 422 | 449 | 458 |
| 37 | CMT6     | <i>C. manginecans</i> | Indonesia | <i>A. acacinofoora</i> | 210 | 218 | 244 | 265 | 301 | 330 | 350 | 422 | 449 | 458 |
| 38 | CMT7     | <i>C. manginecans</i> | Indonesia | <i>A. acacinofoora</i> | 210 | 218 | 244 | 265 | 301 | 330 | 350 | 422 | 449 | 458 |
| 39 | CMT8     | <i>C. manginecans</i> | Indonesia | <i>A. acacinofoora</i> | 210 | 218 | 244 | 265 | 301 | 330 | 350 | 422 | 449 | 458 |
| 40 | CMT9     | <i>C. manginecans</i> | Indonesia | <i>A. acacinofoora</i> | 210 | 218 | 244 | 265 | 301 | 330 | 350 | 422 | 449 | 458 |
| 41 | CMT94    | <i>C. manginecans</i> | Indonesia | <i>A. acacinofoora</i> | 210 | 218 | 244 | 265 | 301 | 330 | 350 | 422 | 449 | 458 |
| 42 | CMT95    | <i>C. manginecans</i> | Indonesia | <i>A. acacinofoora</i> | 210 | 218 | 244 | 265 | 301 | 330 | 350 | 422 | 449 | 458 |
| 43 | CMT96    | <i>C. manginecans</i> | Indonesia | <i>A. acacinofoora</i> | 210 | 218 | 244 | 265 | 301 | 330 | 350 | 422 | 449 | 458 |
| 44 | CMT98    | <i>C. manginecans</i> | Indonesia | <i>A. acacinofoora</i> | 210 | 218 | 244 | 265 | 301 | 330 | 350 | 422 | 449 | 458 |
| 45 | CMT99    | <i>C. manginecans</i> | Indonesia | <i>A. acacinofoora</i> | 210 | 218 | 244 | 265 | 301 | 330 | 350 | 422 | 449 | 458 |
| 46 | CMT14    | <i>C. manginecans</i> | Indonesia | <i>A. acacinofoora</i> | 210 | 218 | 244 | 265 | 301 | 330 | 350 | 422 | 449 | 999 |
| 47 | CMT4     | <i>C. manginecans</i> | Indonesia | <i>A. acacinofoora</i> | 210 | 218 | 244 | 265 | 301 | 330 | 350 | 422 | 449 | 999 |
| 48 | CMW22587 | <i>C. manginecans</i> | Indonesia | <i>A. mangium</i>      | 210 | 218 | 244 | 265 | 295 | 330 | 350 | 422 | 449 | 458 |
| 49 | CMW22588 | <i>C. manginecans</i> | Indonesia | <i>A. mangium</i>      | 210 | 218 | 244 | 265 | 295 | 330 | 350 | 422 | 449 | 458 |
| 50 | CMW22589 | <i>C. manginecans</i> | Indonesia | <i>A. mangium</i>      | 210 | 218 | 244 | 265 | 295 | 330 | 350 | 422 | 449 | 458 |
| 51 | CMW22590 | <i>C. manginecans</i> | Indonesia | <i>A. mangium</i>      | 210 | 218 | 244 | 265 | 295 | 330 | 350 | 422 | 449 | 458 |
| 52 | CMW22591 | <i>C. manginecans</i> | Indonesia | <i>A. mangium</i>      | 210 | 218 | 244 | 265 | 295 | 330 | 350 | 422 | 449 | 458 |
| 53 | CMW22593 | <i>C. manginecans</i> | Indonesia | <i>A. mangium</i>      | 210 | 218 | 244 | 265 | 295 | 330 | 350 | 422 | 449 | 458 |
| 54 | CMW22594 | <i>C. manginecans</i> | Indonesia | <i>A. mangium</i>      | 210 | 218 | 244 | 265 | 295 | 330 | 350 | 422 | 449 | 458 |
| 55 | CMW22595 | <i>C. manginecans</i> | Indonesia | <i>A. mangium</i>      | 210 | 218 | 244 | 265 | 295 | 330 | 350 | 422 | 449 | 458 |
| 56 | CMW22596 | <i>C. manginecans</i> | Indonesia | <i>A. mangium</i>      | 210 | 218 | 244 | 265 | 295 | 330 | 350 | 422 | 449 | 458 |
| 57 | CMW22597 | <i>C. manginecans</i> | Indonesia | <i>A. mangium</i>      | 210 | 218 | 244 | 265 | 295 | 330 | 350 | 422 | 449 | 458 |
| 58 | CMW22598 | <i>C. manginecans</i> | Indonesia | <i>A. mangium</i>      | 210 | 218 | 244 | 265 | 295 | 330 | 350 | 422 | 449 | 458 |
| 59 | CMW22618 | <i>C. manginecans</i> | Indonesia | <i>A. mangium</i>      | 210 | 218 | 244 | 265 | 295 | 330 | 350 | 422 | 449 | 461 |
| 60 | CMW22619 | <i>C. manginecans</i> | Indonesia | <i>A. mangium</i>      | 210 | 218 | 244 | 265 | 295 | 330 | 350 | 422 | 449 | 461 |
| 61 | CMW22621 | <i>C. manginecans</i> | Indonesia | <i>A. mangium</i>      | 210 | 218 | 244 | 265 | 295 | 330 | 350 | 422 | 449 | 461 |
| 62 | CMW22622 | <i>C. manginecans</i> | Indonesia | <i>A. mangium</i>      | 210 | 218 | 244 | 265 | 295 | 330 | 350 | 422 | 449 | 461 |
| 63 | CMW22623 | <i>C. manginecans</i> | Indonesia | <i>A. mangium</i>      | 210 | 218 | 244 | 265 | 295 | 330 | 350 | 422 | 449 | 461 |
| 64 | CMW22625 | <i>C. manginecans</i> | Indonesia | <i>A. mangium</i>      | 210 | 218 | 244 | 265 | 295 | 330 | 350 | 422 | 449 | 461 |
| 65 | CMW22626 | <i>C. manginecans</i> | Indonesia | <i>A. mangium</i>      | 210 | 218 | 244 | 265 | 295 | 330 | 350 | 422 | 449 | 461 |
| 66 | CMT64    | <i>C. manginecans</i> | Indonesia | <i>A. acacinofoora</i> | 210 | 218 | 244 | 265 | 295 | 330 | 350 | 422 | 449 | 461 |
| 67 | CMT65    | <i>C. manginecans</i> | Indonesia | <i>A. acacinofoora</i> | 210 | 218 | 244 | 265 | 295 | 330 | 350 | 422 | 449 | 461 |
| 68 | CMT67    | <i>C. manginecans</i> | Indonesia | <i>A. acacinofoora</i> | 210 | 218 | 244 | 265 | 295 | 330 | 350 | 422 | 449 | 461 |
| 69 | CMT32    | <i>C. manginecans</i> | Indonesia | <i>A. acacinofoora</i> | 210 | 218 | 244 | 265 | 295 | 330 | 347 | 422 | 449 | 458 |



|     |          |                         |           |                   |     |     |     |     |     |     |     |     |     |     |
|-----|----------|-------------------------|-----------|-------------------|-----|-----|-----|-----|-----|-----|-----|-----|-----|-----|
| 104 | CMW22617 | <i>C. manginecans</i>   | Indonesia | <i>A. mangium</i> | 210 | 221 | 244 | 265 | 295 | 327 | 350 | 422 | 449 | 458 |
| 105 | CMW22599 | <i>C. manginecans</i>   | Indonesia | <i>A. mangium</i> | 210 | 221 | 244 | 253 | 295 | 327 | 347 | 422 | 449 | 461 |
| 106 | CMW22602 | <i>C. manginecans</i>   | Indonesia | <i>A. mangium</i> | 210 | 221 | 244 | 253 | 295 | 327 | 347 | 422 | 449 | 461 |
| 107 | CMW22604 | <i>C. manginecans</i>   | Indonesia | <i>A. mangium</i> | 210 | 221 | 244 | 253 | 295 | 327 | 347 | 422 | 449 | 461 |
| 108 | CMW22605 | <i>C. manginecans</i>   | Indonesia | <i>A. mangium</i> | 210 | 221 | 244 | 253 | 295 | 327 | 347 | 422 | 449 | 461 |
| 109 | CMW22610 | <i>C. manginecans</i>   | Indonesia | <i>A. mangium</i> | 210 | 221 | 244 | 253 | 295 | 327 | 347 | 422 | 449 | 461 |
| 110 | CMW22611 | <i>C. manginecans</i>   | Indonesia | <i>A. mangium</i> | 210 | 221 | 244 | 253 | 295 | 327 | 347 | 422 | 449 | 461 |
| 111 | CMW41202 | <i>C. manginecans</i>   | Malaysia  | <i>A. mangium</i> | 204 | 221 | 244 | 253 | 295 | 330 | 350 | 422 | 449 | 461 |
| 112 | CMW41190 | <i>C. manginecans</i>   | Malaysia  | <i>A. mangium</i> | 204 | 221 | 244 | 253 | 295 | 327 | 347 | 422 | 449 | 458 |
| 113 | CMW42003 | <i>C. manginecans</i>   | Malaysia  | <i>A. mangium</i> | 210 | 218 | 244 | 253 | 295 | 327 | 347 | 422 | 449 | 458 |
| 114 | CMW41203 | <i>C. eucalypticola</i> | Malaysia  | <i>A. mangium</i> | 210 | 221 | 244 | 253 | 301 | 330 | 350 | 422 | 449 | 458 |
| 115 | CMW39172 | <i>C. manginecans</i>   | Malaysia  | <i>A. mangium</i> | 210 | 221 | 244 | 253 | 295 | 330 | 347 | 416 | 449 | 458 |
| 116 | CMW41147 | <i>C. manginecans</i>   | Malaysia  | <i>A. mangium</i> | 210 | 221 | 244 | 253 | 295 | 330 | 347 | 416 | 449 | 446 |
| 117 | CMW41168 | <i>C. manginecans</i>   | Malaysia  | <i>A. mangium</i> | 210 | 221 | 244 | 253 | 295 | 330 | 347 | 416 | 449 | 446 |
| 118 | CMW38751 | <i>C. manginecans</i>   | Malaysia  | <i>A. mangium</i> | 210 | 221 | 244 | 253 | 295 | 330 | 347 | 422 | 449 | 458 |
| 119 | CMW38754 | <i>C. manginecans</i>   | Malaysia  | <i>A. mangium</i> | 210 | 221 | 244 | 253 | 295 | 330 | 347 | 422 | 449 | 458 |
| 120 | CMW41155 | <i>C. manginecans</i>   | Malaysia  | <i>A. mangium</i> | 210 | 221 | 244 | 253 | 295 | 330 | 347 | 422 | 449 | 458 |
| 121 | CMW41171 | <i>C. manginecans</i>   | Malaysia  | <i>A. mangium</i> | 210 | 221 | 244 | 253 | 295 | 330 | 347 | 422 | 449 | 458 |
| 122 | CMW41193 | <i>C. manginecans</i>   | Malaysia  | <i>A. mangium</i> | 210 | 221 | 244 | 253 | 295 | 330 | 347 | 422 | 449 | 458 |
| 123 | CMW41152 | <i>C. manginecans</i>   | Malaysia  | <i>A. mangium</i> | 210 | 221 | 244 | 253 | 295 | 330 | 347 | 422 | 449 | 446 |
| 124 | CMW41160 | <i>C. manginecans</i>   | Malaysia  | <i>A. mangium</i> | 210 | 221 | 244 | 253 | 295 | 330 | 347 | 422 | 449 | 446 |
| 125 | CMW41181 | <i>C. manginecans</i>   | Malaysia  | <i>A. mangium</i> | 210 | 221 | 244 | 253 | 295 | 330 | 347 | 422 | 449 | 446 |
| 126 | CMW42006 | <i>C. manginecans</i>   | Malaysia  | <i>A. mangium</i> | 210 | 221 | 244 | 253 | 295 | 330 | 347 | 422 | 449 | 461 |
| 127 | CMW38750 | <i>C. manginecans</i>   | Malaysia  | <i>A. mangium</i> | 210 | 221 | 244 | 253 | 295 | 327 | 347 | 422 | 449 | 458 |
| 128 | CMW38753 | <i>C. manginecans</i>   | Malaysia  | <i>A. mangium</i> | 210 | 221 | 244 | 253 | 295 | 327 | 347 | 422 | 449 | 458 |
| 129 | CMW39136 | <i>C. manginecans</i>   | Malaysia  | <i>A. mangium</i> | 210 | 221 | 244 | 253 | 295 | 327 | 347 | 422 | 449 | 458 |
| 130 | CMW39141 | <i>C. manginecans</i>   | Malaysia  | <i>A. mangium</i> | 210 | 221 | 244 | 253 | 295 | 327 | 347 | 422 | 449 | 458 |
| 131 | CMW39152 | <i>C. manginecans</i>   | Malaysia  | <i>A. mangium</i> | 210 | 221 | 244 | 253 | 295 | 327 | 347 | 422 | 449 | 458 |
| 132 | CMW39155 | <i>C. manginecans</i>   | Malaysia  | <i>A. mangium</i> | 210 | 221 | 244 | 253 | 295 | 327 | 347 | 422 | 449 | 458 |
| 133 | CMW39157 | <i>C. manginecans</i>   | Malaysia  | <i>A. mangium</i> | 210 | 221 | 244 | 253 | 295 | 327 | 347 | 422 | 449 | 458 |
| 134 | CMW39162 | <i>C. manginecans</i>   | Malaysia  | <i>A. mangium</i> | 210 | 221 | 244 | 253 | 295 | 327 | 347 | 422 | 449 | 458 |
| 135 | CMW39168 | <i>C. manginecans</i>   | Malaysia  | <i>A. mangium</i> | 210 | 221 | 244 | 253 | 295 | 327 | 347 | 422 | 449 | 458 |
| 136 | CMW39171 | <i>C. manginecans</i>   | Malaysia  | <i>A. mangium</i> | 210 | 221 | 244 | 253 | 295 | 327 | 347 | 422 | 449 | 458 |
| 137 | CMW39180 | <i>C. manginecans</i>   | Malaysia  | <i>A. mangium</i> | 210 | 221 | 244 | 253 | 295 | 327 | 347 | 422 | 449 | 458 |

|     |          |                         |          |                       |     |     |     |     |     |     |     |     |     |     |
|-----|----------|-------------------------|----------|-----------------------|-----|-----|-----|-----|-----|-----|-----|-----|-----|-----|
| 138 | CMW39182 | <i>C. manginecans</i>   | Malaysia | <i>A. mangium</i>     | 210 | 221 | 244 | 253 | 295 | 327 | 347 | 422 | 449 | 458 |
| 139 | CMW41138 | <i>C. manginecans</i>   | Malaysia | <i>A. mangium</i>     | 210 | 221 | 244 | 253 | 295 | 327 | 347 | 422 | 449 | 458 |
| 140 | CMW41149 | <i>C. manginecans</i>   | Malaysia | <i>A. mangium</i>     | 210 | 221 | 244 | 253 | 295 | 327 | 347 | 422 | 449 | 458 |
| 141 | CMW41157 | <i>C. manginecans</i>   | Malaysia | <i>A. mangium</i>     | 210 | 221 | 244 | 253 | 295 | 327 | 347 | 422 | 449 | 458 |
| 142 | CMW41170 | <i>C. manginecans</i>   | Malaysia | <i>A. mangium</i>     | 210 | 221 | 244 | 253 | 295 | 327 | 347 | 422 | 449 | 458 |
| 143 | CMW41173 | <i>C. manginecans</i>   | Malaysia | <i>A. mangium</i>     | 210 | 221 | 244 | 253 | 295 | 327 | 347 | 422 | 449 | 458 |
| 144 | CMW41174 | <i>C. manginecans</i>   | Malaysia | <i>A. mangium</i>     | 210 | 221 | 244 | 253 | 295 | 327 | 347 | 422 | 449 | 458 |
| 145 | CMW41182 | <i>C. manginecans</i>   | Malaysia | <i>A. mangium</i>     | 210 | 221 | 244 | 253 | 295 | 327 | 347 | 422 | 449 | 458 |
| 146 | CMW41194 | <i>C. manginecans</i>   | Malaysia | <i>A. mangium</i>     | 210 | 221 | 244 | 253 | 295 | 327 | 347 | 422 | 449 | 458 |
| 147 | CMW39144 | <i>C. manginecans</i>   | Malaysia | <i>A. mangium</i>     | 210 | 221 | 244 | 253 | 295 | 327 | 347 | 422 | 449 | 446 |
| 148 | CMW39149 | <i>C. manginecans</i>   | Malaysia | <i>A. mangium</i>     | 210 | 221 | 244 | 253 | 295 | 327 | 347 | 422 | 449 | 446 |
| 149 | CMW39161 | <i>C. manginecans</i>   | Malaysia | <i>A. mangium</i>     | 210 | 221 | 244 | 253 | 295 | 327 | 347 | 422 | 449 | 446 |
| 150 | CMW39173 | <i>C. manginecans</i>   | Malaysia | <i>A. mangium</i>     | 210 | 221 | 244 | 253 | 295 | 327 | 347 | 422 | 449 | 446 |
| 151 | CMW39174 | <i>C. manginecans</i>   | Malaysia | <i>A. mangium</i>     | 210 | 221 | 244 | 253 | 295 | 327 | 347 | 422 | 449 | 446 |
| 152 | CMW39176 | <i>C. manginecans</i>   | Malaysia | <i>A. mangium</i>     | 210 | 221 | 244 | 253 | 295 | 327 | 347 | 422 | 449 | 446 |
| 153 | CMW41140 | <i>C. manginecans</i>   | Malaysia | <i>A. mangium</i>     | 210 | 221 | 244 | 253 | 295 | 327 | 347 | 422 | 449 | 446 |
| 154 | CMW41143 | <i>C. manginecans</i>   | Malaysia | <i>A. mangium</i>     | 210 | 221 | 244 | 253 | 295 | 327 | 347 | 422 | 449 | 446 |
| 155 | CMW41150 | <i>C. manginecans</i>   | Malaysia | <i>A. mangium</i>     | 210 | 221 | 244 | 253 | 295 | 327 | 347 | 422 | 449 | 446 |
| 156 | CMW41164 | <i>C. manginecans</i>   | Malaysia | <i>A. mangium</i>     | 210 | 221 | 244 | 253 | 295 | 327 | 347 | 422 | 449 | 446 |
| 157 | CMW41169 | <i>C. manginecans</i>   | Malaysia | <i>A. mangium</i>     | 210 | 221 | 244 | 253 | 295 | 327 | 347 | 422 | 449 | 446 |
| 158 | CMW39139 | <i>C. manginecans</i>   | Malaysia | <i>A. mangium</i>     | 210 | 221 | 244 | 253 | 295 | 327 | 347 | 422 | 449 | 461 |
| 159 | CMW41139 | <i>C. manginecans</i>   | Malaysia | <i>A. mangium</i>     | 210 | 221 | 244 | 253 | 295 | 327 | 347 | 422 | 449 | 464 |
| 160 | CMW41148 | <i>C. manginecans</i>   | Malaysia | <i>A. mangium</i>     | 210 | 221 | 244 | 253 | 295 | 327 | 347 | 422 | 446 | 446 |
| 161 | CMW41146 | <i>C. manginecans</i>   | Malaysia | <i>A. mangium</i>     | 210 | 221 | 244 | 253 | 295 | 324 | 347 | 422 | 449 | 458 |
| 162 | CMW36164 | <i>C. manginecans</i>   | Malaysia | <i>A. mangium</i>     | 210 | 221 | 244 | 253 | 292 | 330 | 347 | 422 | 449 | 458 |
| 163 | CMW39153 | <i>C. manginecans</i>   | Malaysia | <i>A. mangium</i>     | 210 | 221 | 244 | 253 | 292 | 330 | 347 | 422 | 449 | 458 |
| 164 | CMW41142 | <i>C. manginecans</i>   | Malaysia | <i>A. mangium</i>     | 213 | 221 | 244 | 253 | 295 | 327 | 347 | 422 | 449 | 458 |
| 165 | CMW41159 | <i>C. manginecans</i>   | Malaysia | <i>A. mangium</i>     | 213 | 221 | 244 | 253 | 295 | 327 | 347 | 422 | 449 | 458 |
| 166 | CMW49238 | <i>C. eucalypticola</i> | Brazil   | <i>Eucalyptus</i> sp. | 204 | 218 | 250 | 253 | 301 | 330 | 350 | 416 | 458 | 428 |
| 167 | CMW49250 | <i>C. eucalypticola</i> | Brazil   | <i>Eucalyptus</i> sp. | 204 | 218 | 250 | 253 | 301 | 330 | 350 | 419 | 458 | 449 |
| 168 | CMW49237 | <i>C. eucalypticola</i> | Brazil   | <i>Eucalyptus</i> sp. | 204 | 218 | 250 | 253 | 301 | 330 | 353 | 419 | 452 | 428 |
| 169 | CMW49233 | <i>C. eucalypticola</i> | Brazil   | <i>Eucalyptus</i> sp. | 204 | 218 | 250 | 253 | 301 | 330 | 353 | 419 | 452 | 428 |
| 170 | CMW49252 | <i>C. eucalypticola</i> | Brazil   | <i>Eucalyptus</i> sp. | 201 | 218 | 250 | 253 | 301 | 330 | 350 | 416 | 455 | 434 |
| 171 | CMW49253 | <i>C. eucalypticola</i> | Brazil   | <i>Eucalyptus</i> sp. | 201 | 218 | 250 | 253 | 301 | 330 | 350 | 416 | 455 | 434 |

|     |          |                         |           |                       |     |     |     |     |     |     |     |     |     |     |
|-----|----------|-------------------------|-----------|-----------------------|-----|-----|-----|-----|-----|-----|-----|-----|-----|-----|
| 172 | CMW49239 | <i>C. eucalypticola</i> | Brazil    | <i>Eucalyptus</i> sp. | 201 | 218 | 250 | 253 | 301 | 330 | 350 | 416 | 455 | 437 |
| 173 | CMW49236 | <i>C. eucalypticola</i> | Brazil    | <i>Eucalyptus</i> sp. | 201 | 218 | 250 | 253 | 301 | 330 | 350 | 419 | 455 | 428 |
| 174 | CMW49254 | <i>C. eucalypticola</i> | Brazil    | <i>Eucalyptus</i> sp. | 201 | 218 | 250 | 253 | 301 | 330 | 350 | 419 | 455 | 449 |
| 175 | CMW49255 | <i>C. eucalypticola</i> | Brazil    | <i>Eucalyptus</i> sp. | 201 | 218 | 250 | 253 | 301 | 330 | 350 | 419 | 455 | 449 |
| 176 | CMW4903  | <i>C. eucalypticola</i> | Brazil    | <i>Eucalyptus</i> sp. | 201 | 218 | 250 | 253 | 301 | 330 | 350 | 419 | 455 | 452 |
| 177 | CMW49251 | <i>C. eucalypticola</i> | Brazil    | <i>Eucalyptus</i> sp. | 201 | 218 | 250 | 253 | 301 | 330 | 350 | 419 | 455 | 452 |
| 178 | CMW49235 | <i>C. eucalypticola</i> | Brazil    | <i>Eucalyptus</i> sp. | 201 | 218 | 250 | 253 | 295 | 330 | 350 | 416 | 455 | 434 |
| 179 | CERC2453 | <i>C. eucalypticola</i> | China, FJ | <i>Eucalyptus</i> sp. | 204 | 218 | 250 | 265 | 301 | 330 | 350 | 416 | 458 | 452 |
| 180 | CERC2454 | <i>C. eucalypticola</i> | China, FJ | <i>Eucalyptus</i> sp. | 204 | 218 | 250 | 265 | 301 | 330 | 350 | 416 | 458 | 452 |
| 181 | CERC2455 | <i>C. eucalypticola</i> | China, FJ | <i>Eucalyptus</i> sp. | 204 | 218 | 250 | 265 | 301 | 330 | 350 | 416 | 458 | 452 |
| 182 | CERC2476 | <i>C. eucalypticola</i> | China, FJ | <i>Eucalyptus</i> sp. | 204 | 218 | 250 | 265 | 301 | 330 | 350 | 416 | 458 | 452 |
| 183 | CERC2477 | <i>C. eucalypticola</i> | China, FJ | <i>Eucalyptus</i> sp. | 204 | 218 | 250 | 265 | 301 | 330 | 350 | 416 | 458 | 452 |
| 184 | CERC2478 | <i>C. eucalypticola</i> | China, FJ | <i>Eucalyptus</i> sp. | 204 | 218 | 250 | 265 | 301 | 330 | 350 | 416 | 458 | 452 |
| 185 | CERC2479 | <i>C. eucalypticola</i> | China, FJ | <i>Eucalyptus</i> sp. | 204 | 218 | 250 | 265 | 301 | 330 | 350 | 416 | 458 | 452 |
| 186 | CERC2480 | <i>C. eucalypticola</i> | China, FJ | <i>Eucalyptus</i> sp. | 201 | 218 | 250 | 265 | 301 | 330 | 350 | 416 | 458 | 452 |
| 187 | CERC2487 | <i>C. eucalypticola</i> | China, FJ | <i>Eucalyptus</i> sp. | 201 | 218 | 250 | 253 | 301 | 330 | 350 | 416 | 458 | 455 |
| 188 | CERC2488 | <i>C. eucalypticola</i> | China, FJ | <i>Eucalyptus</i> sp. | 201 | 218 | 250 | 253 | 301 | 330 | 350 | 416 | 458 | 455 |
| 189 | CERC2489 | <i>C. eucalypticola</i> | China, FJ | <i>Eucalyptus</i> sp. | 201 | 218 | 250 | 253 | 301 | 330 | 350 | 416 | 458 | 455 |
| 190 | CERC2490 | <i>C. eucalypticola</i> | China, FJ | <i>Eucalyptus</i> sp. | 201 | 218 | 250 | 253 | 301 | 330 | 350 | 416 | 458 | 455 |
| 191 | CERC2491 | <i>C. eucalypticola</i> | China, FJ | <i>Eucalyptus</i> sp. | 201 | 218 | 250 | 253 | 301 | 330 | 350 | 416 | 458 | 455 |
| 192 | CERC2545 | <i>C. eucalypticola</i> | China, GD | <i>Eucalyptus</i> sp. | 204 | 218 | 250 | 265 | 301 | 330 | 344 | 416 | 458 | 425 |
| 193 | CERC2546 | <i>C. eucalypticola</i> | China, GD | <i>Eucalyptus</i> sp. | 204 | 218 | 250 | 265 | 301 | 330 | 344 | 416 | 458 | 425 |
| 194 | CERC2612 | <i>C. eucalypticola</i> | China, GD | <i>Eucalyptus</i> sp. | 204 | 218 | 250 | 265 | 301 | 330 | 344 | 416 | 452 | 452 |
| 195 | CMW24667 | <i>C. eucalypticola</i> | China, GD | <i>Eucalyptus</i> sp. | 204 | 218 | 250 | 253 | 301 | 330 | 350 | 416 | 458 | 452 |
| 196 | CERC2555 | <i>C. eucalypticola</i> | China, GD | <i>Eucalyptus</i> sp. | 204 | 218 | 250 | 253 | 301 | 330 | 350 | 416 | 452 | 452 |
| 197 | CERC2556 | <i>C. eucalypticola</i> | China, GD | <i>Eucalyptus</i> sp. | 204 | 218 | 250 | 253 | 301 | 330 | 350 | 416 | 452 | 452 |
| 198 | CERC2557 | <i>C. eucalypticola</i> | China, GD | <i>Eucalyptus</i> sp. | 204 | 218 | 250 | 253 | 301 | 330 | 350 | 416 | 452 | 452 |
| 199 | CMW24664 | <i>C. eucalypticola</i> | China, GD | <i>Eucalyptus</i> sp. | 204 | 218 | 253 | 265 | 301 | 330 | 350 | 416 | 458 | 425 |
| 200 | CMW24673 | <i>C. eucalypticola</i> | China, GD | <i>Eucalyptus</i> sp. | 204 | 218 | 253 | 265 | 301 | 330 | 350 | 416 | 458 | 425 |
| 201 | CERC2620 | <i>C. eucalypticola</i> | China, GD | <i>Eucalyptus</i> sp. | 204 | 218 | 253 | 253 | 301 | 330 | 350 | 416 | 452 | 452 |
| 202 | CERC2621 | <i>C. eucalypticola</i> | China, GD | <i>Eucalyptus</i> sp. | 204 | 218 | 253 | 253 | 301 | 330 | 350 | 416 | 452 | 452 |
| 203 | CERC2629 | <i>C. manginecans</i>   | China, GD | <i>Eucalyptus</i> sp. | 204 | 221 | 253 | 253 | 295 | 330 | 347 | 422 | 452 | 458 |
| 204 | CERC2630 | <i>C. manginecans</i>   | China, GD | <i>Eucalyptus</i> sp. | 204 | 221 | 253 | 253 | 295 | 330 | 347 | 422 | 452 | 458 |
| 205 | CERC2631 | <i>C. manginecans</i>   | China, GD | <i>Eucalyptus</i> sp. | 204 | 221 | 253 | 253 | 295 | 330 | 347 | 422 | 452 | 458 |



|     |          |                         |           |                       |     |     |     |     |     |     |     |     |     |     |
|-----|----------|-------------------------|-----------|-----------------------|-----|-----|-----|-----|-----|-----|-----|-----|-----|-----|
| 206 | CERC2632 | <i>C. manginecans</i>   | China, GD | <i>Eucalyptus</i> sp. | 204 | 221 | 253 | 253 | 295 | 330 | 347 | 422 | 452 | 458 |
| 207 | CERC2633 | <i>C. manginecans</i>   | China, GD | <i>Eucalyptus</i> sp. | 204 | 221 | 253 | 253 | 295 | 330 | 347 | 422 | 452 | 458 |
| 208 | CERC2634 | <i>C. manginecans</i>   | China, GD | <i>Eucalyptus</i> sp. | 204 | 221 | 253 | 253 | 295 | 330 | 347 | 422 | 452 | 458 |
| 209 | CERC2635 | <i>C. manginecans</i>   | China, GD | <i>Eucalyptus</i> sp. | 204 | 221 | 253 | 253 | 295 | 330 | 347 | 422 | 452 | 458 |
| 210 | CERC2636 | <i>C. manginecans</i>   | China, GD | <i>Eucalyptus</i> sp. | 204 | 221 | 253 | 253 | 295 | 330 | 347 | 422 | 452 | 458 |
| 211 | CERC2637 | <i>C. manginecans</i>   | China, GD | <i>Eucalyptus</i> sp. | 204 | 221 | 253 | 253 | 295 | 330 | 347 | 422 | 452 | 458 |
| 212 | CERC2638 | <i>C. manginecans</i>   | China, GD | <i>Eucalyptus</i> sp. | 204 | 221 | 253 | 253 | 295 | 330 | 347 | 422 | 452 | 458 |
| 213 | CERC2639 | <i>C. manginecans</i>   | China, GD | <i>Eucalyptus</i> sp. | 204 | 221 | 253 | 253 | 295 | 330 | 347 | 422 | 452 | 458 |
| 214 | CERC2640 | <i>C. manginecans</i>   | China, GD | <i>Eucalyptus</i> sp. | 204 | 221 | 253 | 253 | 295 | 330 | 347 | 422 | 452 | 458 |
| 215 | CERC2641 | <i>C. manginecans</i>   | China, GD | <i>Eucalyptus</i> sp. | 204 | 221 | 253 | 253 | 295 | 330 | 347 | 422 | 452 | 458 |
| 216 | CERC2642 | <i>C. manginecans</i>   | China, GD | <i>Eucalyptus</i> sp. | 204 | 221 | 253 | 253 | 295 | 330 | 347 | 422 | 452 | 458 |
| 217 | CERC2643 | <i>C. manginecans</i>   | China, GD | <i>Eucalyptus</i> sp. | 204 | 221 | 253 | 253 | 295 | 330 | 347 | 422 | 452 | 458 |
| 218 | CERC2644 | <i>C. manginecans</i>   | China, GD | <i>Eucalyptus</i> sp. | 204 | 221 | 253 | 253 | 295 | 330 | 347 | 422 | 452 | 458 |
| 219 | CERC2645 | <i>C. manginecans</i>   | China, GD | <i>Eucalyptus</i> sp. | 204 | 221 | 253 | 253 | 295 | 330 | 347 | 422 | 452 | 458 |
| 220 | CERC2624 | <i>C. manginecans</i>   | China, GD | <i>Eucalyptus</i> sp. | 210 | 221 | 250 | 253 | 301 | 330 | 347 | 422 | 449 | 458 |
| 221 | CERC2625 | <i>C. manginecans</i>   | China, GD | <i>Eucalyptus</i> sp. | 210 | 221 | 250 | 253 | 301 | 330 | 347 | 422 | 449 | 458 |
| 222 | CERC2626 | <i>C. manginecans</i>   | China, GD | <i>Eucalyptus</i> sp. | 210 | 221 | 250 | 253 | 301 | 330 | 347 | 422 | 449 | 458 |
| 223 | CERC2589 | <i>C. eucalypticola</i> | China, GD | <i>Eucalyptus</i> sp. | 201 | 218 | 250 | 253 | 301 | 330 | 353 | 416 | 452 | 452 |
| 224 | CERC2590 | <i>C. eucalypticola</i> | China, GD | <i>Eucalyptus</i> sp. | 201 | 218 | 250 | 253 | 301 | 330 | 353 | 416 | 452 | 452 |
| 225 | CERC2591 | <i>C. eucalypticola</i> | China, GD | <i>Eucalyptus</i> sp. | 201 | 218 | 250 | 253 | 301 | 330 | 353 | 416 | 452 | 452 |
| 226 | CERC2592 | <i>C. eucalypticola</i> | China, GD | <i>Eucalyptus</i> sp. | 201 | 218 | 250 | 253 | 301 | 330 | 353 | 416 | 452 | 452 |
| 227 | CERC2613 | <i>C. eucalypticola</i> | China, GD | <i>Eucalyptus</i> sp. | 201 | 218 | 250 | 253 | 301 | 330 | 353 | 416 | 452 | 452 |
| 228 | CERC2614 | <i>C. eucalypticola</i> | China, GD | <i>Eucalyptus</i> sp. | 201 | 218 | 250 | 253 | 301 | 330 | 353 | 416 | 452 | 452 |
| 229 | CERC2615 | <i>C. eucalypticola</i> | China, GD | <i>Eucalyptus</i> sp. | 201 | 218 | 250 | 253 | 301 | 330 | 353 | 416 | 452 | 452 |
| 230 | CERC2616 | <i>C. eucalypticola</i> | China, GD | <i>Eucalyptus</i> sp. | 201 | 218 | 250 | 253 | 301 | 330 | 353 | 416 | 452 | 452 |
| 231 | CERC2617 | <i>C. eucalypticola</i> | China, GD | <i>Eucalyptus</i> sp. | 201 | 218 | 250 | 253 | 301 | 330 | 353 | 416 | 452 | 452 |
| 232 | CERC2618 | <i>C. eucalypticola</i> | China, GD | <i>Eucalyptus</i> sp. | 201 | 218 | 250 | 253 | 301 | 330 | 353 | 416 | 452 | 452 |
| 233 | CERC2619 | <i>C. eucalypticola</i> | China, GD | <i>Eucalyptus</i> sp. | 201 | 218 | 250 | 253 | 301 | 330 | 353 | 416 | 452 | 452 |
| 234 | CERC2622 | <i>C. eucalypticola</i> | China, GD | <i>Eucalyptus</i> sp. | 201 | 218 | 250 | 253 | 301 | 330 | 353 | 416 | 452 | 452 |
| 235 | CERC2623 | <i>C. eucalypticola</i> | China, GD | <i>Eucalyptus</i> sp. | 201 | 218 | 250 | 253 | 301 | 330 | 353 | 416 | 452 | 452 |
| 236 | CERC2627 | <i>C. eucalypticola</i> | China, GD | <i>Eucalyptus</i> sp. | 201 | 218 | 253 | 265 | 301 | 330 | 350 | 416 | 458 | 452 |
| 237 | CERC2628 | <i>C. eucalypticola</i> | China, GD | <i>Eucalyptus</i> sp. | 201 | 218 | 253 | 265 | 301 | 330 | 350 | 416 | 458 | 452 |
| 238 | CERC2593 | <i>C. eucalypticola</i> | China, GD | <i>Eucalyptus</i> sp. | 201 | 218 | 253 | 265 | 301 | 330 | 344 | 416 | 458 | 452 |
| 239 | CERC2594 | <i>C. eucalypticola</i> | China, GD | <i>Eucalyptus</i> sp. | 201 | 218 | 253 | 265 | 301 | 330 | 344 | 416 | 458 | 452 |



|     |          |                         |           |                         |     |     |     |     |     |     |     |     |     |     |
|-----|----------|-------------------------|-----------|-------------------------|-----|-----|-----|-----|-----|-----|-----|-----|-----|-----|
| 274 | CERC2084 | <i>C. eucalypticola</i> | China, HN | <i>Eucalyptus</i> sp.   | 204 | 218 | 250 | 253 | 301 | 330 | 350 | 416 | 452 | 452 |
| 275 | CERC2085 | <i>C. eucalypticola</i> | China, HN | <i>Eucalyptus</i> sp.   | 204 | 218 | 250 | 253 | 301 | 330 | 350 | 416 | 452 | 452 |
| 276 | CERC2088 | <i>C. eucalypticola</i> | China, HN | <i>Eucalyptus</i> sp.   | 204 | 218 | 250 | 253 | 301 | 330 | 350 | 416 | 452 | 452 |
| 277 | CERC2089 | <i>C. eucalypticola</i> | China, HN | <i>Eucalyptus</i> sp.   | 204 | 218 | 250 | 253 | 301 | 330 | 350 | 416 | 452 | 452 |
| 278 | CERC2097 | <i>C. eucalypticola</i> | China, HN | <i>Eucalyptus</i> sp.   | 204 | 218 | 250 | 253 | 301 | 330 | 350 | 416 | 452 | 452 |
| 279 | CERC2101 | <i>C. eucalypticola</i> | China, HN | <i>Eucalyptus</i> sp.   | 204 | 218 | 250 | 253 | 301 | 330 | 350 | 416 | 452 | 452 |
| 280 | CERC2102 | <i>C. eucalypticola</i> | China, HN | <i>Eucalyptus</i> sp.   | 204 | 218 | 250 | 253 | 301 | 330 | 350 | 416 | 452 | 452 |
| 281 | CERC2190 | <i>C. eucalypticola</i> | China, HN | <i>Eucalyptus</i> sp.   | 204 | 218 | 253 | 265 | 301 | 330 | 350 | 416 | 458 | 452 |
| 282 | CERC2191 | <i>C. eucalypticola</i> | China, HN | <i>Eucalyptus</i> sp.   | 204 | 218 | 253 | 265 | 301 | 330 | 350 | 416 | 458 | 452 |
| 283 | CERC2192 | <i>C. eucalypticola</i> | China, HN | <i>Eucalyptus</i> sp.   | 204 | 218 | 253 | 265 | 301 | 330 | 350 | 416 | 458 | 452 |
| 284 | CERC2193 | <i>C. eucalypticola</i> | China, HN | <i>Eucalyptus</i> sp.   | 204 | 218 | 253 | 265 | 301 | 330 | 350 | 416 | 458 | 452 |
| 285 | CERC2194 | <i>C. eucalypticola</i> | China, HN | <i>Eucalyptus</i> sp.   | 204 | 218 | 253 | 265 | 301 | 330 | 350 | 416 | 458 | 452 |
| 286 | CERC2195 | <i>C. eucalypticola</i> | China, HN | <i>Eucalyptus</i> sp.   | 204 | 218 | 253 | 265 | 301 | 330 | 350 | 416 | 458 | 452 |
| 287 | CERC2196 | <i>C. eucalypticola</i> | China, HN | <i>Eucalyptus</i> sp.   | 204 | 218 | 253 | 265 | 301 | 330 | 350 | 416 | 458 | 452 |
| 288 | CERC2126 | <i>C. eucalypticola</i> | China, HN | <i>Eucalyptus</i> sp.   | 204 | 218 | 253 | 265 | 301 | 330 | 344 | 416 | 458 | 452 |
| 289 | CERC2127 | <i>C. eucalypticola</i> | China, HN | <i>Eucalyptus</i> sp.   | 204 | 218 | 253 | 265 | 301 | 330 | 344 | 416 | 458 | 452 |
| 290 | CERC2129 | <i>C. eucalypticola</i> | China, HN | <i>Eucalyptus</i> sp.   | 204 | 218 | 253 | 265 | 301 | 330 | 344 | 416 | 458 | 452 |
| 291 | CERC2121 | <i>C. eucalypticola</i> | China, HN | <i>Eucalyptus</i> sp.   | 204 | 218 | 256 | 265 | 301 | 330 | 350 | 416 | 458 | 452 |
| 292 | CERC2122 | <i>C. eucalypticola</i> | China, HN | <i>Eucalyptus</i> sp.   | 204 | 218 | 256 | 265 | 301 | 330 | 350 | 416 | 458 | 452 |
| 293 | CERC2123 | <i>C. eucalypticola</i> | China, HN | <i>Eucalyptus</i> sp.   | 204 | 218 | 256 | 265 | 301 | 330 | 350 | 416 | 458 | 452 |
| 294 | CERC2124 | <i>C. eucalypticola</i> | China, HN | <i>Eucalyptus</i> sp.   | 204 | 218 | 256 | 265 | 301 | 330 | 350 | 416 | 458 | 452 |
| 295 | CERC2125 | <i>C. eucalypticola</i> | China, HN | <i>Eucalyptus</i> sp.   | 204 | 218 | 256 | 265 | 301 | 330 | 350 | 416 | 458 | 452 |
| 296 | CERC2116 | <i>C. eucalypticola</i> | China, HN | <i>Eucalyptus</i> sp.   | 210 | 218 | 253 | 265 | 301 | 330 | 350 | 416 | 458 | 425 |
| 297 | CERC2117 | <i>C. eucalypticola</i> | China, HN | <i>Eucalyptus</i> sp.   | 210 | 218 | 253 | 265 | 301 | 330 | 350 | 416 | 458 | 425 |
| 298 | CERC2118 | <i>C. eucalypticola</i> | China, HN | <i>Eucalyptus</i> sp.   | 210 | 218 | 253 | 265 | 301 | 330 | 350 | 416 | 458 | 425 |
| 299 | CERC2119 | <i>C. eucalypticola</i> | China, HN | <i>Eucalyptus</i> sp.   | 210 | 218 | 253 | 265 | 301 | 330 | 350 | 416 | 458 | 425 |
| 300 | CERC2120 | <i>C. eucalypticola</i> | China, HN | <i>Eucalyptus</i> sp.   | 210 | 218 | 253 | 265 | 301 | 330 | 350 | 416 | 458 | 425 |
| 301 | CERC2128 | <i>C. eucalypticola</i> | China, HN | <i>Eucalyptus</i> sp.   | 210 | 218 | 253 | 253 | 301 | 330 | 344 | 416 | 458 | 452 |
| 302 | CERC5510 | <i>C. eucalypticola</i> | China, YN | <i>Eucalyptus</i> sp.   | 204 | 218 | 250 | 265 | 301 | 330 | 350 | 416 | 458 | 425 |
| 303 | CERC5512 | <i>C. eucalypticola</i> | China, YN | <i>Eucalyptus</i> sp.   | 204 | 218 | 250 | 265 | 301 | 330 | 350 | 416 | 458 | 425 |
| 304 | CERC5515 | <i>C. eucalypticola</i> | China, YN | <i>Eucalyptus</i> sp.   | 204 | 218 | 250 | 265 | 301 | 330 | 350 | 416 | 458 | 425 |
| 305 | CMW4781  | <i>C. eucalypticola</i> | Congo     | <i>Eucalyptus</i> clone | 204 | 218 | 250 | 253 | 301 | 330 | 347 | 416 | 452 | 431 |
| 306 | CMW4786  | <i>C. eucalypticola</i> | Congo     | <i>Eucalyptus</i> clone | 204 | 218 | 250 | 253 | 301 | 330 | 347 | 416 | 452 | 431 |
| 307 | CMW4787  | <i>C. eucalypticola</i> | Congo     | <i>Eucalyptus</i> clone | 204 | 218 | 250 | 253 | 301 | 330 | 347 | 416 | 452 | 431 |

|     |          |                         |           |                         |     |     |     |     |     |     |     |     |     |     |
|-----|----------|-------------------------|-----------|-------------------------|-----|-----|-----|-----|-----|-----|-----|-----|-----|-----|
| 308 | CMW4788  | <i>C. eucalypticola</i> | Congo     | <i>Eucalyptus</i> clone | 204 | 218 | 250 | 253 | 301 | 330 | 347 | 416 | 452 | 431 |
| 309 | CMW4791  | <i>C. eucalypticola</i> | Congo     | <i>Eucalyptus</i> clone | 204 | 218 | 250 | 253 | 301 | 330 | 347 | 416 | 452 | 431 |
| 310 | CMW4797  | <i>C. eucalypticola</i> | Congo     | <i>Eucalyptus</i> clone | 204 | 218 | 250 | 253 | 301 | 330 | 347 | 416 | 452 | 431 |
| 311 | CMW4799  | <i>C. eucalypticola</i> | Congo     | <i>Eucalyptus</i> clone | 204 | 218 | 250 | 253 | 301 | 330 | 347 | 416 | 452 | 431 |
| 312 | CMW4800  | <i>C. eucalypticola</i> | Congo     | <i>Eucalyptus</i> clone | 204 | 218 | 250 | 253 | 301 | 330 | 347 | 416 | 452 | 431 |
| 313 | CMW4803  | <i>C. eucalypticola</i> | Congo     | <i>Eucalyptus</i> clone | 204 | 218 | 250 | 253 | 301 | 330 | 347 | 416 | 452 | 431 |
| 314 | CMW4808  | <i>C. eucalypticola</i> | Congo     | <i>Eucalyptus</i> clone | 204 | 218 | 250 | 253 | 301 | 330 | 347 | 416 | 452 | 431 |
| 315 | CMW4809  | <i>C. eucalypticola</i> | Congo     | <i>Eucalyptus</i> clone | 204 | 218 | 250 | 253 | 301 | 330 | 347 | 416 | 452 | 431 |
| 316 | CMW4748  | <i>C. eucalypticola</i> | Congo     | <i>Eucalyptus</i> clone | 204 | 218 | 238 | 253 | 301 | 330 | 347 | 416 | 449 | 431 |
| 317 | CMW4782  | <i>C. eucalypticola</i> | Congo     | <i>Eucalyptus</i> clone | 204 | 218 | 238 | 253 | 301 | 330 | 347 | 416 | 449 | 431 |
| 318 | CMW4785  | <i>C. eucalypticola</i> | Congo     | <i>Eucalyptus</i> clone | 204 | 218 | 238 | 253 | 301 | 330 | 347 | 416 | 449 | 431 |
| 319 | CMW4794  | <i>C. eucalypticola</i> | Congo     | <i>Eucalyptus</i> clone | 204 | 218 | 238 | 253 | 301 | 330 | 347 | 416 | 449 | 431 |
| 320 | CMW4795  | <i>C. eucalypticola</i> | Congo     | <i>Eucalyptus</i> clone | 204 | 218 | 238 | 253 | 301 | 330 | 347 | 416 | 449 | 431 |
| 321 | CMW4796  | <i>C. eucalypticola</i> | Congo     | <i>Eucalyptus</i> clone | 204 | 218 | 238 | 253 | 301 | 330 | 347 | 416 | 449 | 431 |
| 322 | CMW4802  | <i>C. eucalypticola</i> | Congo     | <i>Eucalyptus</i> clone | 204 | 218 | 238 | 253 | 301 | 330 | 347 | 416 | 449 | 431 |
| 323 | CMW4804  | <i>C. eucalypticola</i> | Congo     | <i>Eucalyptus</i> clone | 204 | 218 | 238 | 253 | 301 | 330 | 347 | 416 | 449 | 431 |
| 324 | CMW4806  | <i>C. eucalypticola</i> | Congo     | <i>Eucalyptus</i> clone | 204 | 218 | 238 | 253 | 301 | 330 | 347 | 416 | 449 | 431 |
| 325 | CMW4807  | <i>C. eucalypticola</i> | Congo     | <i>Eucalyptus</i> clone | 204 | 218 | 238 | 253 | 301 | 330 | 347 | 416 | 449 | 431 |
| 326 | CMW4810  | <i>C. eucalypticola</i> | Congo     | <i>Eucalyptus</i> clone | 204 | 218 | 238 | 253 | 301 | 330 | 347 | 416 | 449 | 431 |
| 327 | CMW14628 | <i>C. eucalypticola</i> | Indonesia | <i>Eucalyptus</i> sp.   | 204 | 218 | 250 | 265 | 301 | 330 | 350 | 416 | 458 | 425 |
| 328 | CMW18563 | <i>C. eucalypticola</i> | Indonesia | <i>Eucalyptus</i> sp.   | 204 | 218 | 250 | 265 | 301 | 330 | 350 | 416 | 458 | 425 |
| 329 | CMW18564 | <i>C. eucalypticola</i> | Indonesia | <i>Eucalyptus</i> sp.   | 204 | 218 | 250 | 265 | 301 | 330 | 350 | 416 | 458 | 425 |
| 330 | CMW18572 | <i>C. eucalypticola</i> | Indonesia | <i>Eucalyptus</i> sp.   | 204 | 218 | 250 | 265 | 301 | 330 | 350 | 416 | 458 | 425 |
| 331 | CMW18573 | <i>C. eucalypticola</i> | Indonesia | <i>Eucalyptus</i> sp.   | 204 | 218 | 250 | 265 | 301 | 330 | 350 | 416 | 458 | 425 |
| 332 | CMW20621 | <i>C. eucalypticola</i> | Indonesia | <i>Eucalyptus</i> sp.   | 204 | 218 | 250 | 265 | 301 | 330 | 350 | 416 | 458 | 425 |
| 333 | CMW20626 | <i>C. eucalypticola</i> | Indonesia | <i>Eucalyptus</i> sp.   | 204 | 218 | 250 | 265 | 301 | 330 | 350 | 416 | 458 | 425 |
| 334 | CMW20628 | <i>C. eucalypticola</i> | Indonesia | <i>Eucalyptus</i> sp.   | 204 | 218 | 250 | 265 | 301 | 330 | 350 | 416 | 458 | 425 |
| 335 | CMW20629 | <i>C. eucalypticola</i> | Indonesia | <i>Eucalyptus</i> sp.   | 204 | 218 | 250 | 265 | 301 | 330 | 350 | 416 | 458 | 425 |
| 336 | CMW20636 | <i>C. eucalypticola</i> | Indonesia | <i>Eucalyptus</i> sp.   | 204 | 218 | 250 | 265 | 301 | 330 | 350 | 416 | 458 | 425 |
| 337 | CMW20637 | <i>C. eucalypticola</i> | Indonesia | <i>Eucalyptus</i> sp.   | 204 | 218 | 250 | 265 | 301 | 330 | 350 | 416 | 458 | 425 |
| 338 | CMW20640 | <i>C. eucalypticola</i> | Indonesia | <i>Eucalyptus</i> sp.   | 204 | 218 | 250 | 265 | 301 | 330 | 350 | 416 | 458 | 425 |
| 339 | CMW20641 | <i>C. eucalypticola</i> | Indonesia | <i>Eucalyptus</i> sp.   | 204 | 218 | 250 | 265 | 301 | 330 | 350 | 416 | 458 | 425 |
| 340 | CMW20663 | <i>C. eucalypticola</i> | Indonesia | <i>Eucalyptus</i> sp.   | 204 | 218 | 250 | 265 | 301 | 330 | 350 | 416 | 458 | 425 |
| 341 | CMW20665 | <i>C. eucalypticola</i> | Indonesia | <i>Eucalyptus</i> sp.   | 204 | 218 | 250 | 265 | 301 | 330 | 350 | 416 | 458 | 425 |

|     |          |                         |              |                           |     |     |     |     |     |     |     |     |     |     |
|-----|----------|-------------------------|--------------|---------------------------|-----|-----|-----|-----|-----|-----|-----|-----|-----|-----|
| 342 | CMW21034 | <i>C. manginecans</i>   | Indonesia    | <i>Eucalyptus</i> sp.     | 204 | 218 | 250 | 265 | 301 | 330 | 350 | 416 | 458 | 425 |
| 343 | CMW20632 | <i>C. eucalypticola</i> | Indonesia    | <i>Eucalyptus</i> sp.     | 204 | 221 | 250 | 265 | 301 | 330 | 350 | 416 | 458 | 425 |
| 344 | CMW20972 | <i>C. manginecans</i>   | Indonesia    | <i>Eucalyptus</i> sp.     | 210 | 218 | 244 | 265 | 301 | 330 | 347 | 416 | 449 | 461 |
| 345 | CMW20977 | <i>C. manginecans</i>   | Indonesia    | <i>Eucalyptus</i> sp.     | 210 | 218 | 244 | 265 | 301 | 330 | 347 | 416 | 449 | 461 |
| 346 | CMW18577 | <i>C. eucalypticola</i> | Indonesia    | <i>Eucalyptus</i> sp.     | 210 | 221 | 250 | 265 | 301 | 330 | 350 | 422 | 449 | 458 |
| 347 | CMW20638 | <i>C. eucalypticola</i> | Indonesia    | <i>Eucalyptus</i> sp.     | 210 | 221 | 250 | 265 | 301 | 330 | 350 | 422 | 449 | 455 |
| 348 | CMW20648 | <i>C. eucalypticola</i> | Indonesia    | <i>Eucalyptus</i> sp.     | 210 | 221 | 250 | 265 | 295 | 330 | 350 | 422 | 449 | 458 |
| 349 | CMW21044 | <i>C. manginecans</i>   | Indonesia    | <i>Eucalyptus</i> sp.     | 210 | 221 | 244 | 265 | 301 | 330 | 350 | 416 | 449 | 458 |
| 350 | CMW21046 | <i>C. manginecans</i>   | Indonesia    | <i>Eucalyptus</i> sp.     | 210 | 221 | 244 | 265 | 301 | 330 | 350 | 416 | 449 | 458 |
| 351 | CMW21028 | <i>C. manginecans</i>   | Indonesia    | <i>Eucalyptus</i> sp.     | 210 | 221 | 244 | 265 | 301 | 330 | 350 | 422 | 449 | 458 |
| 352 | CMW21048 | <i>C. manginecans</i>   | Indonesia    | <i>Eucalyptus</i> sp.     | 210 | 221 | 244 | 265 | 301 | 330 | 350 | 422 | 449 | 458 |
| 353 | CMW21025 | <i>C. eucalypticola</i> | Indonesia    | <i>Eucalyptus</i> sp.     | 210 | 221 | 244 | 265 | 304 | 330 | 350 | 422 | 449 | 458 |
| 354 | CMW21049 | <i>C. eucalypticola</i> | Indonesia    | <i>Eucalyptus</i> sp.     | 210 | 221 | 244 | 265 | 304 | 330 | 350 | 422 | 449 | 458 |
| 355 | CMW13030 | <i>C. eucalypticola</i> | South Africa | <i>Eucalyptus</i> sp.     | 204 | 218 | 250 | 253 | 301 | 330 | 350 | 416 | 455 | 452 |
| 356 | CMW15062 | <i>C. eucalypticola</i> | South Africa | <i>Eucalyptus grandis</i> | 204 | 218 | 250 | 253 | 301 | 330 | 350 | 416 | 455 | 452 |
| 357 | CMW10000 | <i>C. eucalypticola</i> | South Africa | <i>E. grandis</i>         | 204 | 218 | 253 | 253 | 301 | 330 | 350 | 416 | 452 | 452 |
| 358 | CMW12277 | <i>C. eucalypticola</i> | South Africa | <i>E. grandis</i>         | 204 | 218 | 253 | 253 | 301 | 330 | 350 | 416 | 452 | 452 |
| 359 | CMW12666 | <i>C. eucalypticola</i> | South Africa | <i>E. grandis</i>         | 204 | 218 | 253 | 253 | 301 | 330 | 350 | 416 | 452 | 452 |
| 360 | CMW13019 | <i>C. eucalypticola</i> | South Africa | <i>Eucalyptus</i> sp.     | 204 | 218 | 253 | 253 | 301 | 330 | 350 | 416 | 452 | 452 |
| 361 | CMW13022 | <i>C. eucalypticola</i> | South Africa | <i>Eucalyptus</i> sp.     | 204 | 218 | 253 | 253 | 301 | 330 | 350 | 416 | 452 | 452 |
| 362 | CMW13023 | <i>C. eucalypticola</i> | South Africa | <i>Eucalyptus</i> sp.     | 204 | 218 | 253 | 253 | 301 | 330 | 350 | 416 | 452 | 452 |
| 363 | CMW13027 | <i>C. eucalypticola</i> | South Africa | <i>Eucalyptus</i> sp.     | 204 | 218 | 253 | 253 | 301 | 330 | 350 | 416 | 452 | 452 |
| 364 | CMW13028 | <i>C. eucalypticola</i> | South Africa | <i>Eucalyptus</i> sp.     | 204 | 218 | 253 | 253 | 301 | 330 | 350 | 416 | 452 | 452 |
| 365 | CMW13040 | <i>C. eucalypticola</i> | South Africa | <i>Eucalyptus</i> sp.     | 204 | 218 | 253 | 253 | 301 | 330 | 350 | 416 | 452 | 452 |
| 366 | CMW13041 | <i>C. eucalypticola</i> | South Africa | <i>Eucalyptus</i> sp.     | 204 | 218 | 253 | 253 | 301 | 330 | 350 | 416 | 452 | 452 |
| 367 | CMW15061 | <i>C. eucalypticola</i> | South Africa | <i>E. grandis</i>         | 204 | 218 | 253 | 253 | 301 | 330 | 350 | 416 | 452 | 452 |
| 368 | CMW9998  | <i>C. eucalypticola</i> | South Africa | <i>E. grandis</i>         | 204 | 218 | 253 | 253 | 301 | 330 | 350 | 416 | 452 | 452 |
| 369 | CMW12276 | <i>C. eucalypticola</i> | South Africa | <i>E. grandis</i>         | 204 | 218 | 253 | 253 | 301 | 330 | 350 | 416 | 455 | 452 |
| 370 | CMW15054 | <i>C. eucalypticola</i> | South Africa | <i>E. grandis</i>         | 201 | 218 | 250 | 253 | 301 | 330 | 350 | 416 | 452 | 458 |
| 371 | CMW11700 | <i>C. eucalypticola</i> | South Africa | <i>E. grandis</i>         | 201 | 218 | 250 | 253 | 301 | 330 | 350 | 416 | 452 | 452 |
| 372 | CMW15053 | <i>C. eucalypticola</i> | South Africa | <i>E. grandis</i>         | 201 | 218 | 250 | 253 | 301 | 330 | 350 | 416 | 452 | 452 |
| 373 | CMW15056 | <i>C. eucalypticola</i> | South Africa | <i>E. grandis</i>         | 201 | 218 | 250 | 253 | 301 | 330 | 350 | 416 | 455 | 452 |
| 374 | CMW15066 | <i>C. eucalypticola</i> | South Africa | <i>E. grandis</i>         | 201 | 218 | 250 | 253 | 301 | 330 | 350 | 416 | 455 | 452 |
| 375 | CMW15067 | <i>C. eucalypticola</i> | South Africa | <i>E. grandis</i>         | 201 | 218 | 250 | 253 | 301 | 330 | 350 | 416 | 455 | 452 |

|     |          |                         |              |                         |     |     |     |     |     |     |     |     |     |     |
|-----|----------|-------------------------|--------------|-------------------------|-----|-----|-----|-----|-----|-----|-----|-----|-----|-----|
| 376 | CMW11701 | <i>C. eucalypticola</i> | South Africa | <i>E. grandis</i>       | 201 | 218 | 250 | 253 | 301 | 330 | 350 | 416 | 455 | 455 |
| 377 | CMW15055 | <i>C. eucalypticola</i> | South Africa | <i>E. grandis</i>       | 201 | 218 | 253 | 253 | 301 | 330 | 350 | 416 | 452 | 452 |
| 378 | CMW15058 | <i>C. eucalypticola</i> | South Africa | <i>E. grandis</i>       | 201 | 218 | 253 | 253 | 301 | 330 | 350 | 416 | 452 | 452 |
| 379 | CMW12664 | <i>C. eucalypticola</i> | South Africa | <i>E. grandis</i>       | 201 | 218 | 253 | 253 | 301 | 330 | 350 | 416 | 452 | 455 |
| 380 | CMW12665 | <i>C. eucalypticola</i> | South Africa | <i>E. grandis</i>       | 201 | 218 | 253 | 253 | 301 | 330 | 350 | 416 | 452 | 455 |
| 381 | CMW12670 | <i>C. eucalypticola</i> | South Africa | <i>E. grandis</i>       | 201 | 218 | 253 | 253 | 301 | 330 | 350 | 416 | 452 | 455 |
| 382 | CMW15070 | <i>C. eucalypticola</i> | South Africa | <i>E. grandis</i>       | 201 | 218 | 253 | 253 | 301 | 330 | 350 | 416 | 455 | 458 |
| 383 | CMW39447 | <i>C. eucalypticola</i> | Uruguay      | <i>E. grandis</i>       | 204 | 218 | 250 | 253 | 301 | 330 | 350 | 416 | 458 | 449 |
| 384 | CMW39484 | <i>C. eucalypticola</i> | Uruguay      | <i>E. grandis</i>       | 204 | 218 | 250 | 253 | 301 | 330 | 350 | 416 | 458 | 449 |
| 385 | CMW39487 | <i>C. eucalypticola</i> | Uruguay      | <i>E. grandis</i>       | 204 | 218 | 250 | 253 | 301 | 330 | 350 | 416 | 458 | 449 |
| 386 | CMW39488 | <i>C. eucalypticola</i> | Uruguay      | <i>E. grandis</i>       | 204 | 218 | 250 | 253 | 301 | 330 | 344 | 416 | 458 | 449 |
| 387 | CMW39442 | <i>C. eucalypticola</i> | Uruguay      | <i>E. grandis</i>       | 204 | 218 | 250 | 253 | 301 | 330 | 353 | 416 | 458 | 452 |
| 388 | CMW39453 | <i>C. eucalypticola</i> | Uruguay      | <i>E. grandis</i>       | 204 | 218 | 250 | 253 | 295 | 330 | 350 | 416 | 458 | 449 |
| 389 | CMW39441 | <i>C. eucalypticola</i> | Uruguay      | <i>E. grandis</i>       | 204 | 218 | 250 | 253 | 295 | 330 | 353 | 416 | 458 | 452 |
| 390 | CMW15313 | <i>C. manginecans</i>   | Oman         | <i>Mangifera indica</i> | 210 | 221 | 244 | 253 | 295 | 327 | 347 | 422 | 449 | 438 |
| 391 | CMW15314 | <i>C. manginecans</i>   | Oman         | <i>M. indica</i>        | 210 | 221 | 244 | 253 | 295 | 327 | 347 | 422 | 449 | 438 |
| 392 | CMW15315 | <i>C. manginecans</i>   | Oman         | <i>M. indica</i>        | 210 | 221 | 244 | 253 | 295 | 327 | 347 | 422 | 449 | 438 |
| 393 | CMW15316 | <i>C. manginecans</i>   | Oman         | <i>M. indica</i>        | 210 | 221 | 244 | 253 | 295 | 327 | 347 | 422 | 449 | 438 |
| 394 | CMW15317 | <i>C. manginecans</i>   | Oman         | <i>M. indica</i>        | 210 | 221 | 244 | 253 | 295 | 327 | 347 | 422 | 449 | 438 |
| 395 | CMW15353 | <i>C. manginecans</i>   | Oman         | <i>M. indica</i>        | 210 | 221 | 244 | 253 | 295 | 327 | 347 | 422 | 449 | 438 |
| 396 | CMW15366 | <i>C. manginecans</i>   | Oman         | <i>M. indica</i>        | 210 | 221 | 244 | 253 | 295 | 327 | 347 | 422 | 449 | 438 |
| 397 | CMW15369 | <i>C. manginecans</i>   | Oman         | <i>M. indica</i>        | 210 | 221 | 244 | 253 | 295 | 327 | 347 | 422 | 449 | 438 |
| 398 | CMW15371 | <i>C. manginecans</i>   | Oman         | <i>M. indica</i>        | 210 | 221 | 244 | 253 | 295 | 327 | 347 | 422 | 449 | 438 |
| 399 | CMW15377 | <i>C. manginecans</i>   | Oman         | <i>M. indica</i>        | 210 | 221 | 244 | 253 | 295 | 327 | 347 | 422 | 449 | 438 |
| 400 | CMW15381 | <i>C. manginecans</i>   | Oman         | <i>M. indica</i>        | 210 | 221 | 244 | 253 | 295 | 327 | 347 | 422 | 449 | 438 |
| 401 | CMW15382 | <i>C. manginecans</i>   | Oman         | <i>M. indica</i>        | 210 | 221 | 244 | 253 | 295 | 327 | 347 | 422 | 449 | 438 |
| 402 | CMW15384 | <i>C. manginecans</i>   | Oman         | <i>M. indica</i>        | 210 | 221 | 244 | 253 | 295 | 327 | 347 | 422 | 449 | 438 |
| 403 | CMW15385 | <i>C. manginecans</i>   | Oman         | <i>M. indica</i>        | 210 | 221 | 244 | 253 | 295 | 327 | 347 | 422 | 449 | 438 |
| 404 | CMW15391 | <i>C. manginecans</i>   | Oman         | <i>M. indica</i>        | 210 | 221 | 244 | 253 | 295 | 327 | 347 | 422 | 449 | 438 |
| 405 | CMW17567 | <i>C. manginecans</i>   | Pakistan     | <i>M. indica</i>        | 210 | 221 | 244 | 253 | 295 | 327 | 347 | 422 | 449 | 438 |
| 406 | CMW23628 | <i>C. manginecans</i>   | Pakistan     | <i>M. indica</i>        | 210 | 221 | 244 | 253 | 295 | 327 | 347 | 422 | 449 | 438 |
| 407 | CMW23630 | <i>C. manginecans</i>   | Pakistan     | <i>M. indica</i>        | 210 | 221 | 244 | 253 | 295 | 327 | 347 | 422 | 449 | 438 |
| 408 | CMW23637 | <i>C. manginecans</i>   | Pakistan     | <i>M. indica</i>        | 210 | 221 | 244 | 253 | 295 | 327 | 347 | 422 | 449 | 438 |
| 409 | CMW23642 | <i>C. manginecans</i>   | Pakistan     | <i>M. indica</i>        | 210 | 221 | 244 | 253 | 295 | 327 | 347 | 422 | 449 | 438 |

|     |          |                         |           |                        |     |     |     |     |     |     |     |     |     |     |
|-----|----------|-------------------------|-----------|------------------------|-----|-----|-----|-----|-----|-----|-----|-----|-----|-----|
| 410 | CMW23643 | <i>C. manginecans</i>   | Pakistan  | <i>M. indica</i>       | 210 | 221 | 244 | 253 | 295 | 327 | 347 | 422 | 449 | 438 |
| 411 | CERC7783 | <i>C. eucalypticola</i> | China, SC | <i>Punica granatum</i> | 204 | 218 | 250 | 265 | 301 | 330 | 350 | 416 | 458 | 425 |
| 412 | CERC7795 | <i>C. eucalypticola</i> | China, SC | <i>P. granatum</i>     | 204 | 218 | 250 | 265 | 301 | 330 | 350 | 416 | 458 | 425 |
| 413 | CERC7806 | <i>C. eucalypticola</i> | China, SC | <i>P. granatum</i>     | 204 | 218 | 250 | 265 | 301 | 330 | 350 | 416 | 458 | 425 |
| 414 | CERC7832 | <i>C. eucalypticola</i> | China, SC | <i>P. granatum</i>     | 204 | 218 | 250 | 265 | 301 | 330 | 350 | 416 | 458 | 425 |
| 415 | CERC7836 | <i>C. eucalypticola</i> | China, SC | <i>P. granatum</i>     | 204 | 218 | 250 | 265 | 301 | 330 | 350 | 416 | 458 | 425 |
| 416 | CERC7845 | <i>C. eucalypticola</i> | China, SC | <i>P. granatum</i>     | 204 | 218 | 250 | 265 | 301 | 330 | 350 | 416 | 458 | 425 |
| 417 | CERC7847 | <i>C. eucalypticola</i> | China, SC | <i>P. granatum</i>     | 204 | 218 | 250 | 265 | 301 | 330 | 350 | 416 | 458 | 425 |
| 418 | CERC7852 | <i>C. eucalypticola</i> | China, SC | <i>P. granatum</i>     | 204 | 218 | 250 | 265 | 301 | 330 | 350 | 416 | 458 | 425 |
| 419 | CERC7853 | <i>C. eucalypticola</i> | China, SC | <i>P. granatum</i>     | 204 | 218 | 250 | 265 | 301 | 330 | 350 | 416 | 458 | 425 |
| 420 | CERC7822 | <i>C. eucalypticola</i> | China, SC | <i>P. granatum</i>     | 204 | 218 | 250 | 265 | 301 | 330 | 350 | 416 | 458 | 452 |
| 421 | CERC7804 | <i>C. eucalypticola</i> | China, SC | <i>P. granatum</i>     | 204 | 218 | 250 | 265 | 301 | 330 | 350 | 416 | 461 | 425 |
| 422 | CERC7810 | <i>C. eucalypticola</i> | China, SC | <i>P. granatum</i>     | 204 | 218 | 250 | 265 | 304 | 330 | 350 | 416 | 458 | 425 |
| 423 | CERC7802 | <i>C. eucalypticola</i> | China, SC | <i>P. granatum</i>     | 204 | 218 | 250 | 253 | 301 | 330 | 350 | 416 | 458 | 425 |
| 424 | CERC7785 | <i>C. eucalypticola</i> | China, SC | <i>P. granatum</i>     | 204 | 218 | 253 | 253 | 301 | 330 | 350 | 416 | 458 | 452 |
| 425 | CERC7789 | <i>C. eucalypticola</i> | China, SC | <i>P. granatum</i>     | 204 | 218 | 253 | 253 | 301 | 330 | 350 | 416 | 458 | 452 |
| 426 | CERC7791 | <i>C. eucalypticola</i> | China, SC | <i>P. granatum</i>     | 204 | 218 | 253 | 253 | 301 | 330 | 350 | 416 | 458 | 452 |
| 427 | CERC7793 | <i>C. eucalypticola</i> | China, SC | <i>P. granatum</i>     | 204 | 218 | 253 | 253 | 301 | 330 | 350 | 416 | 458 | 452 |
| 428 | CERC7798 | <i>C. eucalypticola</i> | China, SC | <i>P. granatum</i>     | 204 | 218 | 253 | 253 | 301 | 330 | 350 | 416 | 458 | 452 |
| 429 | CERC7800 | <i>C. eucalypticola</i> | China, SC | <i>P. granatum</i>     | 204 | 218 | 253 | 253 | 301 | 330 | 350 | 416 | 458 | 452 |
| 430 | CERC7808 | <i>C. eucalypticola</i> | China, SC | <i>P. granatum</i>     | 204 | 218 | 253 | 253 | 301 | 330 | 350 | 416 | 458 | 452 |
| 431 | CERC7812 | <i>C. eucalypticola</i> | China, SC | <i>P. granatum</i>     | 204 | 218 | 253 | 253 | 301 | 330 | 350 | 416 | 458 | 452 |
| 432 | CERC7814 | <i>C. eucalypticola</i> | China, SC | <i>P. granatum</i>     | 204 | 218 | 253 | 253 | 301 | 330 | 350 | 416 | 458 | 452 |
| 433 | CERC7816 | <i>C. eucalypticola</i> | China, SC | <i>P. granatum</i>     | 204 | 218 | 253 | 253 | 301 | 330 | 350 | 416 | 458 | 452 |
| 434 | CERC7818 | <i>C. eucalypticola</i> | China, SC | <i>P. granatum</i>     | 204 | 218 | 253 | 253 | 301 | 330 | 350 | 416 | 458 | 452 |
| 435 | CERC7824 | <i>C. eucalypticola</i> | China, SC | <i>P. granatum</i>     | 204 | 218 | 253 | 253 | 301 | 330 | 350 | 416 | 458 | 452 |
| 436 | CERC7828 | <i>C. eucalypticola</i> | China, SC | <i>P. granatum</i>     | 204 | 218 | 253 | 253 | 301 | 330 | 350 | 416 | 458 | 452 |
| 437 | CERC7830 | <i>C. eucalypticola</i> | China, SC | <i>P. granatum</i>     | 204 | 218 | 253 | 253 | 301 | 330 | 350 | 416 | 458 | 452 |
| 438 | CERC7838 | <i>C. eucalypticola</i> | China, SC | <i>P. granatum</i>     | 204 | 218 | 253 | 253 | 301 | 330 | 350 | 416 | 458 | 452 |
| 439 | CERC7840 | <i>C. eucalypticola</i> | China, SC | <i>P. granatum</i>     | 204 | 218 | 253 | 253 | 301 | 330 | 350 | 416 | 458 | 452 |
| 440 | CERC7841 | <i>C. eucalypticola</i> | China, SC | <i>P. granatum</i>     | 204 | 218 | 253 | 253 | 301 | 330 | 350 | 416 | 458 | 452 |
| 441 | CERC7850 | <i>C. eucalypticola</i> | China, SC | <i>P. granatum</i>     | 204 | 218 | 253 | 253 | 301 | 330 | 350 | 416 | 458 | 452 |
| 442 | CERC7826 | <i>C. eucalypticola</i> | China, SC | <i>P. granatum</i>     | 201 | 218 | 250 | 265 | 301 | 330 | 350 | 416 | 458 | 425 |
| 443 | CERC7843 | <i>C. eucalypticola</i> | China, SC | <i>P. granatum</i>     | 201 | 218 | 250 | 265 | 301 | 330 | 350 | 416 | 458 | 425 |





|     |          |                         |           |                    |     |     |     |     |     |     |     |     |     |     |
|-----|----------|-------------------------|-----------|--------------------|-----|-----|-----|-----|-----|-----|-----|-----|-----|-----|
| 478 | CERC7727 | <i>C. eucalypticola</i> | China, YN | <i>P. granatum</i> | 201 | 218 | 250 | 265 | 301 | 330 | 350 | 416 | 458 | 425 |
| 479 | CERC7729 | <i>C. eucalypticola</i> | China, YN | <i>P. granatum</i> | 201 | 218 | 250 | 265 | 301 | 330 | 350 | 416 | 458 | 425 |
| 480 | CERC7731 | <i>C. eucalypticola</i> | China, YN | <i>P. granatum</i> | 201 | 218 | 250 | 265 | 301 | 330 | 350 | 416 | 458 | 425 |
| 481 | CERC7733 | <i>C. eucalypticola</i> | China, YN | <i>P. granatum</i> | 201 | 218 | 250 | 265 | 301 | 330 | 350 | 416 | 458 | 425 |
| 482 | CERC7735 | <i>C. eucalypticola</i> | China, YN | <i>P. granatum</i> | 201 | 218 | 250 | 265 | 301 | 330 | 350 | 416 | 458 | 425 |
| 483 | CERC7737 | <i>C. eucalypticola</i> | China, YN | <i>P. granatum</i> | 201 | 218 | 250 | 265 | 301 | 330 | 350 | 416 | 458 | 425 |
| 484 | CERC7739 | <i>C. eucalypticola</i> | China, YN | <i>P. granatum</i> | 201 | 218 | 250 | 265 | 301 | 330 | 350 | 416 | 458 | 425 |
| 485 | CERC7743 | <i>C. eucalypticola</i> | China, YN | <i>P. granatum</i> | 201 | 218 | 250 | 265 | 301 | 330 | 350 | 416 | 458 | 425 |
| 486 | CERC7745 | <i>C. eucalypticola</i> | China, YN | <i>P. granatum</i> | 201 | 218 | 250 | 265 | 301 | 330 | 350 | 416 | 458 | 425 |
| 487 | CERC7747 | <i>C. eucalypticola</i> | China, YN | <i>P. granatum</i> | 201 | 218 | 250 | 265 | 301 | 330 | 350 | 416 | 458 | 425 |
| 488 | CERC7749 | <i>C. eucalypticola</i> | China, YN | <i>P. granatum</i> | 201 | 218 | 250 | 265 | 301 | 330 | 350 | 416 | 458 | 425 |
| 489 | CERC7751 | <i>C. eucalypticola</i> | China, YN | <i>P. granatum</i> | 201 | 218 | 250 | 265 | 301 | 330 | 350 | 416 | 458 | 425 |
| 490 | CERC7753 | <i>C. eucalypticola</i> | China, YN | <i>P. granatum</i> | 201 | 218 | 250 | 265 | 301 | 330 | 350 | 416 | 458 | 425 |
| 491 | CERC7696 | <i>C. eucalypticola</i> | China, YN | <i>P. granatum</i> | 201 | 218 | 250 | 269 | 301 | 330 | 350 | 416 | 458 | 425 |

<sup>a</sup>CMW = Culture collection of the Forestry and Agricultural Biotechnology Institute (FABI), University of Pretoria, Pretoria, South Africa; CERC = Culture collection of China Eucalypt Research Centre (CERC), Chinese Academy of Forestry (CAF), ZhanJiang, GuangDong Province, China.

**Supplementary Table S3.** GenBank numbers alleles sequenced in this study.

| Number | Microsatellite Marker | Repeats                | Sequence length | Genescan length | GenBank number     |
|--------|-----------------------|------------------------|-----------------|-----------------|--------------------|
| 1      | AF2                   | (AGA)8                 | 201             | 198             | MK029868; MK029869 |
| 2      |                       | (AGA)9                 | 204             | 201             | MK029870; MK029871 |
| 3      |                       | (AGA)11                | 210             | 206             | MK029873; MK029874 |
| 4      |                       | (AGA)12                | 213             | 209             | MK029875           |
| 5      | AF3                   | (CTG)12                | 218             | 218             | MK029877; MK029878 |
| 6      |                       | (CTG)13                | 221             | 221             | MK029879; MK029880 |
| 7      | AF4                   | (CAG)2(ACA)6           | 238             | 237             | MK029881; MK029882 |
| 8      |                       | (CAG)2(ACA)8           | 244             | 243             | MK029883; MK029884 |
| 9      |                       | (CAG)2(ACA)10          | 250             | 249             | MK029885; MK029886 |
| 10     |                       | (CAG)3(ACA)10          | 253             | 252             | MK029887; MK029888 |
| 11     |                       | (CAG)3(ACA)11          | 256             | 255             | MK029889; MK029890 |
| 12     | AF5                   | (GTCA)6                | 253             | 250             | MK029891; MK029892 |
| 13     |                       | (GTCA)9                | 265             | 262             | MK029893; MK029894 |
| 14     |                       | (GTCA)10               | 269             | 266             | MK029895           |
| 15     | AF6                   | (GAG)8                 | 292             | 291             | MK029898; MK029899 |
| 16     |                       | (GAG)9                 | 295             | 294             | MK029900; MK029901 |
| 17     |                       | (GAG)11                | 301             | 300             | MK029903; MK029904 |
| 18     |                       | (GAG)12                | 304             | 303             | MK029905; MK029906 |
| 19     | AF7                   | (AGC)8                 | 324             | 319             | MK029907           |
| 20     |                       | (AGC)9                 | 327             | 322             | MK029908; MK029909 |
| 21     |                       | (AGC)10                | 330             | 325             | MK029910; MK029911 |
| 22     |                       | (AGC)11                | 333             | 328             | MK029912; MK029913 |
| 23     | AF8                   | (GAG)9                 | 344             | 343             | MK029914; MK029915 |
| 24     |                       | (GAG)10                | 347             | 346             | MK029916; MK029917 |
| 25     |                       | (GAG)11                | 350             | 349             | MK029918; MK029919 |
| 26     |                       | (GAG)12                | 353             | 352             | MK029920           |
| 27     | AF9                   | (GCA)9                 | 416             | 412             | MK029921; MK029922 |
| 28     |                       | (GCA)10                | 419             | 415             | MK029923; MK029924 |
| 29     |                       | (GCA)11                | 422             | 418             | MK029925; MK029926 |
| 30     | AF11                  | (ACA)6                 | 446             | 444             | MK029929           |
| 31     |                       | (ACA)7                 | 449             | 447             | MK029930; MK029931 |
| 32     |                       | (ACA)8                 | 452             | 450             | MK029932; MK029935 |
| 33     |                       | (ACA)9                 | 455             | 452             | MK029936; MK029937 |
| 34     |                       | (ACA)10                | 458             | 455             | MK029938; MK029939 |
| 35     |                       | (ACA)11                | 461             | 458             | MK029940           |
| 36     | AF12                  | (CCACAA)4(CAG)2(CAA)5  | 425             | 420             | MK029942; MK029943 |
| 37     |                       | (CCACAA)3(CAG)2(CAA)8  | 428             | 423             | MK029944; MK029945 |
| 38     |                       | (CCACAA)3(CAG)2(CAA)9  | 431             | 426             | MK029946; MK029947 |
| 39     |                       | (CCACAA)3(CAG)2(CAA)10 | 434             | 429             | MK029948; MK029949 |
| 40     |                       | (CCACAA)3(CAG)2(CAA)11 | 437             | 432             | MK029950           |

|    |  |                        |     |     |                    |
|----|--|------------------------|-----|-----|--------------------|
| 41 |  | (CCACAA)3(CAG)3(CAA)13 | 446 | 441 | MK029952           |
| 42 |  | (CCACAA)3(CAG)2(CAA)15 | 449 | 444 | MK029954; MK029955 |
| 43 |  | (CCACAA)3(CAG)2(CAA)16 | 452 | 447 | MK029956; MK029957 |
| 44 |  | (CCACAA)3(CAG)2(CAA)17 | 455 | 450 | MK029958; MK029959 |
| 45 |  | (CCACAA)3(CAG)3(CAA)17 | 458 | 453 | MK029960; MK029961 |
| 46 |  | (CCACAA)3(CAG)3(CAA)18 | 461 | 456 | MK029962; MK029963 |
| 47 |  | (CCACAA)3(CAG)3(CAA)19 | 464 | 459 | MK029964           |
